# Supplementary material for: Students who prefer face-to-face tests outperform their online peers in organic chemistry
Source: Royal Society of Chemistry journal article supplement (doi:10.1039/d1rp00324k), 2022-01-01
Supplement: d1rp00324k2.csv [file d1rp00324k2.csv]

GID	ID	Exam	Performance	Grit	Anxiety	Values	Format	planned_schedule	stuck_to_schedule	technology	course_credits	paid_job	extra_curriculars	pressure_balance	cope_balancing	engagement	eng_dummy	comfort_questions	ask_questions	age	international	major	grad_biology	STEM	grad_STEM
DEIDENTIFIED	DEIDENTIFIED	Exam-1	75	NA	NA	NA	Face to Face									NA
DEIDENTIFIED	DEIDENTIFIED	Exam-1	71.5	-0.474935154	1.717988444	-0.984354731	Face to Face	2	4	2	13	15	6	7	2	10-30%	2	3	I did not ask questions at all	20	1	1	1	2	2
DEIDENTIFIED	DEIDENTIFIED	Exam-1	105	0.551357794	-1.968156881	1.271331041	Face to Face	2	2	1	12			2	7	71-100%	5	5	Electronically	20	1	2	2	2	2
DEIDENTIFIED	DEIDENTIFIED	Exam-1	80.5	NA	NA	NA	Face to Face									NA
DEIDENTIFIED	DEIDENTIFIED	Exam-1	72	0.721739339	0.572344975	1.318569285	Face to Face	1	2	2	18		20	5	5	31-50%	3	3	Electronically, In person, and Small Groups	19	1	2	2	2	2
DEIDENTIFIED	DEIDENTIFIED	Exam-1	77	0.395875156	1.717988444	0.762976079	Face to Face	4	4	1	13		8	7	2	10-30%	2	5	I did not ask questions at all	19	1	2	1	1	2
DEIDENTIFIED	DEIDENTIFIED	Exam-1	90	0.668290126	-2.907780939	0.011325246	Face to Face	1	1	1	15		4	1	6	51-70%	4	2	I did not ask questions at all	19	1	1	1	2	2
DEIDENTIFIED	DEIDENTIFIED	Exam-1	94	0.492891628	1.500365423	0.13927589	Face to Face	2	2	1	13	3	2	5	4	10-30%	2	3	I did not ask questions at all	19	1	1	1	2	2
DEIDENTIFIED	DEIDENTIFIED	Exam-1	77	0.668290126	-3.635457424	-0.042338161	Face to Face	5	5	1	17	36	10	7	5	51-70%	4	2	I did not ask questions at all	21	1	1	1	1	1
DEIDENTIFIED	DEIDENTIFIED	Exam-1	93	0.589294568	-2.488058594	0.483693482	Face to Face	1	2	1	16	13	5	7	5	51-70%	4	1	I did not ask questions at all	20	1	2	2	2	2
DEIDENTIFIED	DEIDENTIFIED	Exam-1	77	NA	NA	NA	Face to Face									NA
DEIDENTIFIED	DEIDENTIFIED	Exam-1	67	-0.657541495	1.717988444	1.270404786	Face to Face	2	2	1	15		4	5	5	31-50%	3	4	Electronically	20	1	1	1	2	2
DEIDENTIFIED	DEIDENTIFIED	Exam-1	66	NA	NA	NA	Face to Face									NA
DEIDENTIFIED	DEIDENTIFIED	Exam-1	96	0.515315964	-3.235708591	1.413972028	Face to Face	2	2	2	16		8	5	6	71-100%	5	5	Electronically	20	1	1	1	2	2
DEIDENTIFIED	DEIDENTIFIED	Exam-1	93	-0.286763484	-0.530642242	-0.207468223	Face to Face	2	2	2	14		10	6	5	31-50%	3	2	Electronically	19	1	1	1	2	2
DEIDENTIFIED	DEIDENTIFIED	Exam-1	98	-0.025277822	0.431941569	-1.292932452	Face to Face	2	4	1	15	20	5	6	4	51-70%	4	5	I did not ask questions at all		1	1	1	1	1
DEIDENTIFIED	DEIDENTIFIED	Exam-1	88	0.158608297	0.801309366	0.484766592	Face to Face	2	2	1	14	0	6	5	5	<10%	1	3	I did not ask questions at all	19	1	2	2	1	1
DEIDENTIFIED	DEIDENTIFIED	Exam-1	95	0.612332437	-1.594601509	1.461210272	Face to Face	1	1	1	14		2	2	4	71-100%	5	4	Electronically	20	1	2	2	1	1
DEIDENTIFIED	DEIDENTIFIED	Exam-1	80	-0.829652351	-1.693287757	-0.436220422	Face to Face	1	1	3	14		10	3	5	10-30%	2	2	I did not ask questions at all	19	1	1	1	2	2
DEIDENTIFIED	DEIDENTIFIED	Exam-1	94	NA	NA	NA	Face to Face									NA
DEIDENTIFIED	DEIDENTIFIED	Exam-1	76	0.134839027	-0.93429639	0.386877978	Face to Face	1	2	2	15	0	3	5	5	71-100%	5	5	Small Groups	20	1	1	1	2	2
DEIDENTIFIED	DEIDENTIFIED	Exam-1	97	0.015946594	-0.000615266	0.356876668	Face to Face	1	2	2	18		7	3	6	10-30%	2	2	I did not ask questions at all	20	1	1	1	2	2
DEIDENTIFIED	DEIDENTIFIED	Exam-1	88	-0.265618927	-1.76363059	0.176188871	Face to Face	2	2	1	14	5	5	6	4	31-50%	3	3	Electronically	19	1	1	1	2	2
DEIDENTIFIED	DEIDENTIFIED	Exam-1	79	NA	NA	NA	Face to Face									NA
DEIDENTIFIED	DEIDENTIFIED	Exam-1	94	0.338523135	-0.351487899	0.59849334	Face to Face	1	2	2	17		8	6	5	31-50%	3	2	Electronically	20	1	1	1	1	1
DEIDENTIFIED	DEIDENTIFIED	Exam-1	80	-0.387799001	1.253839714	-2.701584134	Face to Face	4	5	2	14		3	6	5	10-30%	2	1	I did not ask questions at all	19	1	1	1	1	1
DEIDENTIFIED	DEIDENTIFIED	Exam-1	91	0.237603855	0.28437912	0.011925812	Face to Face	3	2	1	18		3	4	6	NA		3	Electronically	20	1	1	1	2	2
DEIDENTIFIED	DEIDENTIFIED	Exam-1	69	-0.146678732	0.871652199	0.263959796	Face to Face	2	3	1	9	8		5	2	31-50%	3	3	Electronically	23	1	2	2	2	2
DEIDENTIFIED	DEIDENTIFIED	Exam-1	85.5	-0.313820397	0.112660832	-1.870340138	Face to Face	2	1	2	17		10	6	5	<10%	1	4	I did not ask questions at all	19	1	2	2	2	2
DEIDENTIFIED	DEIDENTIFIED	Exam-1	64	0.145882888	-0.196771655	0.244236991	Face to Face	2	2	1	16		5	5	5	51-70%	4	3	Small Groups	19	1	1	1	1	1
DEIDENTIFIED	DEIDENTIFIED	Exam-1	70	NA	NA	NA	Face to Face									NA
DEIDENTIFIED	DEIDENTIFIED	Exam-1	80	0.660764696	-0.477583714	0.873496808	Face to Face	2	1	1	11		5	1	5	31-50%	3	5	I did not ask questions at all	19	1	1	1	2	2
DEIDENTIFIED	DEIDENTIFIED	Exam-1	62.5	NA	NA	NA	Face to Face									NA
DEIDENTIFIED	DEIDENTIFIED	Exam-1	98	0.360045088	-3.48074118	0.216953337	Face to Face	1	2	1	15	40		7	7	10-30%	2	2	I did not ask questions at all	21	1	1	1	1	1
DEIDENTIFIED	DEIDENTIFIED	Exam-1	97	NA	NA	NA	Face to Face									NA
DEIDENTIFIED	DEIDENTIFIED	Exam-1	94	0.551357794	0.20000571	0.762976079	Face to Face	2	2	2	14		2	4	4	10-30%	2	5	Electronically	19	1	1	1	2	2
DEIDENTIFIED	DEIDENTIFIED	Exam-1	72.5	-0.800203199	0.913092344	1.114026409	Face to Face	2	4	2	18	0	7	6	2	31-50%	3	1	I did not ask questions at all	21	1	2	2	1	1
DEIDENTIFIED	DEIDENTIFIED	Exam-1	80	0.267283797	-0.547644287	0.777607559	Face to Face	2	2	2	14	15	28	5	7	71-100%	5	2	Electronically and Small Groups	19	1	1	1	1	1
DEIDENTIFIED	DEIDENTIFIED	Exam-1	106	0.655516954	-2.852027956	1.327760719	Face to Face	1	2	1	18	8		4	6	71-100%	5	3	I did not ask questions at all	20	1	1	1	2	2
DEIDENTIFIED	DEIDENTIFIED	Exam-1	99	0.551357794	-1.317977024	0.27979793	Face to Face	1	2	1	14		3	5	5	71-100%	5	5	I did not ask questions at all	20	1	1	1	2	2
DEIDENTIFIED	DEIDENTIFIED	Exam-1	107	0.370711554	-1.739192489	0.166510931	Face to Face	2	2	1	14		3	5	5	51-70%	4	5	Electronically	19	1	1	1	2	2
DEIDENTIFIED	DEIDENTIFIED	Exam-1	75	-1.032270077	-0.112398245	-2.827474694	Face to Face	1	1	1	13		10	5	2	31-50%	3	5	Electronically	19	1	1	1	1	1
DEIDENTIFIED	DEIDENTIFIED	Exam-1	88	-0.292559603	0.871652199	-0.580374267	Face to Face	3	4	2	16	9	9	6	4	51-70%	4	1	Electronically	20	1	1	1	2	2
DEIDENTIFIED	DEIDENTIFIED	Exam-1	76	0.836163194	0.586657812	1.461210272	Face to Face	1	2	1	14		5	5	7	51-70%	4	2	Electronically and In person	19	1	1	1	2	2
DEIDENTIFIED	DEIDENTIFIED	Exam-1	78	0.347673685	0.847214099	0.86686407	Face to Face	1	1	1	13	12	4	7	5	51-70%	4	3	Electronically and Small Groups	20	1	2	2	2	2
DEIDENTIFIED	DEIDENTIFIED	Exam-1	96.5	0.492891628	-0.126428822	-1.314228835	Face to Face	1	1	2	13			5	6	71-100%	5	1	Electronically and Small Groups	20	1	2	2	2	2
DEIDENTIFIED	DEIDENTIFIED	Exam-1	73.5	0.408648328	1.717988444	-2.397652466	Face to Face	2	3	1	15		18	7	6	NA		4	I did not ask questions at all	19	1	2	2	2	2
DEIDENTIFIED	DEIDENTIFIED	Exam-1	61.5	NA	NA	NA	Face to Face									NA
DEIDENTIFIED	DEIDENTIFIED	Exam-1	77	0.429909122	-1.100354003	1.365807529	Face to Face	2	2	2	18	10	15	6	5	10-30%	2	5	I did not ask questions at all	19	1	1	1	2	2
DEIDENTIFIED	DEIDENTIFIED	Exam-1	70	-0.650612204	0.277225325	0.358889995	Face to Face	4	4	2	17		10	7	2	10-30%	2	1	I did not ask questions at all	19	1	2	2	2	2
DEIDENTIFIED	DEIDENTIFIED	Exam-1	67	0.325749963	1.5632722	-0.265310663	Face to Face	2	2	2	15	20	0	5	4	51-70%	4	2	I did not ask questions at all	20	1	2	2	2	2
DEIDENTIFIED	DEIDENTIFIED	Exam-1	86	0.325749963	-0.375925999	0.309151917	Face to Face	2	4	4	10	18	5	5	6	71-100%	5	4	I did not ask questions at all	19	1	1	1	2	2
DEIDENTIFIED	DEIDENTIFIED	Exam-1	75	-0.077216467	0.716935955	-0.227691496	Face to Face	2	2	2	17		5	6	3	31-50%	3	3	Electronically and Small Groups	19	1	1	1	2	2
DEIDENTIFIED	DEIDENTIFIED	Exam-1	69	-0.720074469	1.717988444	-0.701660009	Face to Face	4	5	2	14		12	6	2	<10%	1	1	I did not ask questions at all	21	1	1	1	2	2
DEIDENTIFIED	DEIDENTIFIED	Exam-1	94.5	NA	NA	NA	Face to Face									NA
DEIDENTIFIED	DEIDENTIFIED	Exam-1	89	0.440173818	-0.474612247	0.398555283	Face to Face	1	2	1	12		4	3	5	51-70%	4	4	Electronically and Small Groups	19	1	1	1	1	1
DEIDENTIFIED	DEIDENTIFIED	Exam-1	92	0.551357794	1.057683325	0.539077323	Face to Face	1	2	2	14	16	7	4	4	71-100%	5	3	I did not ask questions at all	20	1	1	1	1	1
DEIDENTIFIED	DEIDENTIFIED	Exam-1	89.5	0.103082747	0.789690983	-1.355081109	Face to Face	5	5	1	13	0	0	7	7	<10%	1	2	I did not ask questions at all	20	1	1	1	2	2
DEIDENTIFIED	DEIDENTIFIED	Exam-1	100.5	NA	NA	NA	Face to Face									NA
DEIDENTIFIED	DEIDENTIFIED	Exam-1	85	-0.146726494	NA	0.194999383	Face to Face	5	5	3	14	15	5	5	5	10-30%	2	2	I did not ask questions at all	20	1	2	2	2	2
DEIDENTIFIED	DEIDENTIFIED	Exam-1	83	0.028719766	1.717988444	0.18630656	Face to Face	2	2	2	17	0	0	7	1	71-100%	5	2	I did not ask questions at all	10	1	1	1	2	2
DEIDENTIFIED	DEIDENTIFIED	Exam-1	85	-0.133174156	0.787278788	0.706059895	Face to Face	2	2	3	14	25	5	7	5	51-70%	4	4	Electronicallyear) arJmall Grounl	24	1	1	1	2	2
DEIDENTIFIED	DEIDENTIFIED	Exam-1	54	-0.716786827	0.825747466	-0.408877905	Face to Face	2	3	2	14		25	4	5	10-30%	2	4	I did not ask questions at all	19	1	1	1	2	2
DEIDENTIFIED	DEIDENTIFIED	Exam-1	39	NA	NA	NA	Face to Face									NA
DEIDENTIFIED	DEIDENTIFIED	Exam-1	61.5	NA	NA	NA	Face to Face									NA
DEIDENTIFIED	DEIDENTIFIED	Exam-1	91.5	NA	NA	NA	Face to Face									NA
DEIDENTIFIED	DEIDENTIFIED	Exam-1	34	-2.268178517	-3.635457424	-2.969189426	Face to Face	1	1	1	7	17	31	1	1	NA		3	I did not ask questions at all	23	2	1	2	2	2
DEIDENTIFIED	DEIDENTIFIED	Exam-1	87.5	0.071904283	-2.476717224	-0.382009788	Face to Face	2	1	2	12		6	3	5	71-100%	5	4	I did not ask questions at all	19	1	1	1	2	2
DEIDENTIFIED	DEIDENTIFIED	Exam-1	92	0.235095378	-3.37192967	1.280522475	Face to Face	1	1	1	15	20	10	5	7	71-100%	5	5	Electronically	20	1	2	2	2	2
DEIDENTIFIED	DEIDENTIFIED	Exam-1	83	0.213834584	-0.874361079	0.127537866	Face to Face	4	4	4	14	6		7	6	51-70%	4	1	I did not ask questions at all	19	1	1	1	1	1
DEIDENTIFIED	DEIDENTIFIED	Exam-1	88	-0.485430639	-3.417834402	-1.263918117	Face to Face	2	4	1	15	20	16	7	7	31-50%	3	5	I did not ask questions at all	21	1	1	1	1	1
DEIDENTIFIED	DEIDENTIFIED	Exam-1	68	NA	NA	NA	Face to Face									NA
DEIDENTIFIED	DEIDENTIFIED	Exam-1	84	NA	NA	NA	Face to Face									NA
DEIDENTIFIED	DEIDENTIFIED	Exam-1	94.5	0.120671523	0.913092344	1.318569285	Face to Face	2	2	1	14		1	2	5	71-100%	5	5	Electronicaffy	19	1	1	1	2	2
DEIDENTIFIED	DEIDENTIFIED	Exam-1	79	0.597050788	1.04068128	-0.677336626	Face to Face	3	5	2	15		3	2	4	10-30%	2	3	I did not ask questions at all	18	1	1	1	1	1
DEIDENTIFIED	DEIDENTIFIED	Exam-1	99	0.721739339	-0.470424672	-0.213834524	Face to Face	2	4	2	15	20	5	7	6	31-50%	3	3	Small Groups	19	1	1	1	2	2
DEIDENTIFIED	DEIDENTIFIED	Exam-1	95	-0.001508552	-1.497131368	-1.244020534	Face to Face	1	1	1	14		8	5	3	71-100%	5	5	Electronically	20	1	2	2	2	2
DEIDENTIFIED	DEIDENTIFIED	Exam-1	75	0.064148064	-0.330021266	1.461210272	Face to Face	2	3	2	14		20	5	5	31-50%	3	3	In person	19	1	1	1	2	2
DEIDENTIFIED	DEIDENTIFIED	Exam-1	97	NA	NA	NA	Face to Face									NA
DEIDENTIFIED	DEIDENTIFIED	Exam-1	64	0.548849317	1.717988444	0.865937815	Face to Face	2	4	3	15	0	1	6	4	51-70%	4	5	Electronically and Small Groups	19	1	1	1	2	2
DEIDENTIFIED	DEIDENTIFIED	Exam-1	52	0.153073337	0.791184103	NA	Face to Face	3	3	1	14	18		7	4	31-50%	3	3	I did not ask questions at all	20	1	2	2	2	2
DEIDENTIFIED	DEIDENTIFIED	Exam-1	80	0.526359825	0.245910443	1.049551232	Face to Face	2	3	4	14	34	27	5	3	10-30%	2	5	I did not ask questions at all	21	1	1	1	2	2
DEIDENTIFIED	DEIDENTIFIED	Exam-1	79.5	-0.034763353	0.671031223	0.263473289	Face to Face	2	2	2	14			1	3	51-70%	4	3	I did not ask questions at all	19	1	1	1	2	2
DEIDENTIFIED	DEIDENTIFIED	Exam-1	95.5	NA	NA	NA	Face to Face									NA
DEIDENTIFIED	DEIDENTIFIED	Exam-1	82	-1.319035578	1.717988444	-0.11206548	Face to Face	5	3	4	17	20	3	5	4	<10%	1	1	Electronically	19	1	1	1	2	2
DEIDENTIFIED	DEIDENTIFIED	Exam-1	82	NA	NA	NA	Face to Face									NA
DEIDENTIFIED	DEIDENTIFIED	Exam-1	65	-0.126197103	0.958997077	-1.740757053	Face to Face	2	2	1	9		5	2	4	71-100%	5	4	I did not ask questions at all	19	1	1	1	2	2
DEIDENTIFIED	DEIDENTIFIED	Exam-1	86.5	0.328471835	-0.392928044	1.461210272	Face to Face	2	2	2	14			1	1	NA		1	Electronically	20	1	1	1	2	2
DEIDENTIFIED	DEIDENTIFIED	Exam-1	55	-0.574904289	1.717988444	1.175928298	Face to Face	2	4	3	13			7	2	10-30%	2	2	Small Groups	20	1	1	1	2	2
DEIDENTIFIED	DEIDENTIFIED	Exam-1	111	NA	NA	NA	Face to Face									NA
DEIDENTIFIED	DEIDENTIFIED	Exam-1	73	-0.792494742	-0.042055412	-0.141480187	Face to Face	2	2	2	12		10	5	4	10-30%	2	4	I did not ask questions at all	20	1	1	1	2	2
DEIDENTIFIED	DEIDENTIFIED	Exam-1	95.5	0.660764696	1.717988444	0.934971053	Face to Face	2	5	1	14	40	15	7	4	51-70%	4	4	Electronically	20	1	1	1	2	2
DEIDENTIFIED	DEIDENTIFIED	Exam-1	95.5	-0.321576616	-0.846951512	-0.026841146	Face to Face	1	2	3	14	5	14	5	6	51-70%	4	3	Electronically	19	1	1	1	2	2
DEIDENTIFIED	DEIDENTIFIED	Exam-1	68	-0.584342056	-0.087960145	-0.484971524	Face to Face	2	2	2	14	0	10	5	4	10-30%	2	1	Electronically		1	2	2	1	1
DEIDENTIFIED	DEIDENTIFIED	Exam-1	101	0.663273173	-0.327049798	1.220680671	Face to Face	1	2	2	16		15	5	5	51-70%	4	3	Electronically	19	1	1	1	2	2
DEIDENTIFIED	DEIDENTIFIED	Exam-1	104	NA	NA	NA	Face to Face									NA
DEIDENTIFIED	DEIDENTIFIED	Exam-1	75	0.203569888	1.717988444	1.080039048	Face to Face	2	2	2	14	0	10	6	5	51-70%	4	1	I did not ask questions at all	19	1	2	2	2	2
DEIDENTIFIED	DEIDENTIFIED	Exam-1	72.25	-0.138970275	0.231597605	-1.267843448	Face to Face	2	4	3	12	20	25	7	2	10-30%	2	4	Small Groups		1	1	1	1	1
DEIDENTIFIED	DEIDENTIFIED	Exam-1	80	0.063368899	-2.730119715	0.089551775	Face to Face	2	2	1	15	6	4	3	5	51-70%	4	4	I did not ask questions at all	20	1	2	2	2	2
DEIDENTIFIED	DEIDENTIFIED	Exam-1	49.5	NA	NA	NA	Face to Face									NA
DEIDENTIFIED	DEIDENTIFIED	Exam-1	92	-0.000729386	-0.980201122	-0.015589628	Face to Face	2	2	2	14	18	4	5	4	51-70%	4	1	Electronically and Small Groupr	19	1	1	1	2	2
DEIDENTIFIED	DEIDENTIFIED	Exam-1	95	0.304489168	-2.897932689	-0.82231663	Face to Face	1	4	1	14		20	4	6	51-70%	4	3	I did not ask questions at all	19	1	2	2	2	2
DEIDENTIFIED	DEIDENTIFIED	Exam-1	86.5	0.533336879	-3.238680059	1.318569285	Face to Face	1	1	1	12	0	0	2	6	71-100%	5	1	Electronically	19	1	2	2	2	2
DEIDENTIFIED	DEIDENTIFIED	Exam-1	70	NA	NA	NA	Face to Face									NA
DEIDENTIFIED	DEIDENTIFIED	Exam-1	82	0.777697028	0.958997077	1.269918279	Face to Face	1	2	2	16	15	10	6	7	71-100%	5	5	Electronically	19	1	2	2	2	2
DEIDENTIFIED	DEIDENTIFIED	Exam-1	90.5	NA	NA	NA	Face to Face									NA
DEIDENTIFIED	DEIDENTIFIED	Exam-1	86.5	0.384995294	-2.392343814	0.069695426	Face to Face	2	2	2	16	0	7	3	5	71-100%	5	3	I did not ask questions at all	20	1	2	2	2	2
DEIDENTIFIED	DEIDENTIFIED	Exam-1	84	-0.378484451	1.717988444	0.762976079	Face to Face	4	4	4	17	10	18	7	3	10-30%	2	5	I did not ask questions at all	19	1	1	1	2	2
DEIDENTIFIED	DEIDENTIFIED	Exam-1	78	0.203569888	-0.583423757	0.079813115	Face to Face	2	2	2	15		15	3	6	31-50%	3	3	Electronically	20	1	2	2	2	2
DEIDENTIFIED	DEIDENTIFIED	Exam-1	75.5	NA	NA	NA	Face to Face									NA
DEIDENTIFIED	DEIDENTIFIED	Exam-1	77	0.116818112	0.934558977	-0.207954729	Face to Face	4	5	1	18		3	3	5	10-30%	2	4	I did not ask questions at all	19	1	1	1	2	2
DEIDENTIFIED	DEIDENTIFIED	Exam-1	69	0.541093098	-0.980201122	0.080786128	Face to Face	2	3	2	13	15	5	5	4	51-70%	4	2	Electronically	19	1	1	1	2	2
DEIDENTIFIED	DEIDENTIFIED	Exam-1	69	0.330997705	-0.477583714	-1.306142101	Face to Face	2	2	2	13		8	7	7	51-70%	4	3	I did not ask questions at all	19	1	1	1	2	2
DEIDENTIFIED	DEIDENTIFIED	Exam-1	101.5	NA	NA	NA	Face to Face									NA
DEIDENTIFIED	DEIDENTIFIED	Exam-1	63	-0.341326842	-0.186646393	0.091431557	Face to Face	2	4	4	15	0	30	6	5	31-50%	3	3	I did not ask questions at all	19	1	1	1	2	2
DEIDENTIFIED	DEIDENTIFIED	Exam-1	85	-0.539475991	1.408555957	1.31949554	Face to Face	4	5	3	16	25	10	7	3	51-70%	4	2	I did not ask questions at all	21	1	1	1	2	2
DEIDENTIFIED	DEIDENTIFIED	Exam-1	96.5	-0.480182897	-0.020588779	-0.015589628	Face to Face	4	4	1	15		15	5	5	31-50%	3	5	Electronically	19	1	1	1	1	1
DEIDENTIFIED	DEIDENTIFIED	Exam-1	59	-0.292559603	0.692497855	-0.166862717	Face to Face	2	3	3	12	15	40	5	5	51-70%	4	4	Small Groups	19	1	1	1	2	2
DEIDENTIFIED	DEIDENTIFIED	Exam-1	85	0.653008477	-1.0431079	-1.725140455	Face to Face	1	2	1	17		0	5	6	31-50%	3	2	I did not ask questions at all	19	1	1	1	2	2
DEIDENTIFIED	DEIDENTIFIED	Exam-1	91	0.176629212	-0.150866922	0.638011774	Face to Face	3	2	2	14		5	3	4	51-70%	4	1	Electronically	20	1	1	1	2	2
DEIDENTIFIED	DEIDENTIFIED	Exam-1	74.5	0.186328139	1.321211079	-0.808180725	Face to Face	3	2	1	14	8	3	5	3	31-50%	3	2	I did not ask questions at all		1	1	1	1	1
DEIDENTIFIED	DEIDENTIFIED	Exam-1	73	-0.294806921	-0.2382118	0.636599013	Face to Face	3	4	1	15	12		3	6	31-50%	3	3	Electronically	20	1	2	2	2	2
DEIDENTIFIED	DEIDENTIFIED	Exam-1	82	-1.156008482	1.253839714	0.232559686	Face to Face	4	5	4	12	0	3	7	1	<10%	1	5	I did not ask questions at all	20	1	2	2	2	2
DEIDENTIFIED	DEIDENTIFIED	Exam-1	67.5	NA	NA	NA	Face to Face									NA
DEIDENTIFIED	DEIDENTIFIED	Exam-1	66	-1.325610862	-1.974099816	-2.167240554	Face to Face	3	4	1	16	10	5	7	4	<10%	1	3	I did not ask questions at all	21	1	1	1	1	1
DEIDENTIFIED	DEIDENTIFIED	Exam-1	91	NA	NA	NA	NA									NA
DEIDENTIFIED	DEIDENTIFIED	Exam-1	39	NA	NA	NA	NA									NA
DEIDENTIFIED	DEIDENTIFIED	Exam-1	60	NA	NA	NA	NA									NA
DEIDENTIFIED	DEIDENTIFIED	Exam-1	86	NA	NA	NA	NA									NA
DEIDENTIFIED	DEIDENTIFIED	Exam-1		NA	NA	NA	NA									NA
DEIDENTIFIED	DEIDENTIFIED	Exam-1	53	NA	NA	NA	NA									NA
DEIDENTIFIED	DEIDENTIFIED	Exam-1		NA	NA	NA	NA									NA
DEIDENTIFIED	DEIDENTIFIED	Exam-1	71	NA	NA	NA	NA									NA
DEIDENTIFIED	DEIDENTIFIED	Exam-1	22	NA	NA	NA	NA									NA
DEIDENTIFIED	DEIDENTIFIED	Exam-1	93	NA	NA	NA	NA									NA
DEIDENTIFIED	DEIDENTIFIED	Exam-1	47.75	NA	NA	NA	NA									NA
DEIDENTIFIED	DEIDENTIFIED	Exam-1	65	NA	NA	NA	NA									NA
DEIDENTIFIED	DEIDENTIFIED	Exam-1	39	NA	NA	NA	NA									NA
DEIDENTIFIED	DEIDENTIFIED	Exam-1	0	NA	NA	NA	NA									NA
DEIDENTIFIED	DEIDENTIFIED	Exam-1	74.5	NA	NA	NA	NA									NA
DEIDENTIFIED	DEIDENTIFIED	Exam-1	0	NA	NA	NA	NA									NA
DEIDENTIFIED	DEIDENTIFIED	Exam-1	61	NA	NA	NA	NA									NA
DEIDENTIFIED	DEIDENTIFIED	Exam-1	79	NA	NA	NA	NA									NA
DEIDENTIFIED	DEIDENTIFIED	Exam-1	52	NA	NA	NA	NA									NA
DEIDENTIFIED	DEIDENTIFIED	Exam-1	76	NA	NA	NA	NA									NA
DEIDENTIFIED	DEIDENTIFIED	Exam-1	82	NA	NA	NA	NA									NA
DEIDENTIFIED	DEIDENTIFIED	Exam-1	71	NA	NA	NA	NA									NA
DEIDENTIFIED	DEIDENTIFIED	Exam-1	79.5	NA	NA	NA	NA									NA
DEIDENTIFIED	DEIDENTIFIED	Exam-1	82.5	NA	NA	NA	NA									NA
DEIDENTIFIED	DEIDENTIFIED	Exam-1	108	NA	NA	NA	NA									NA
DEIDENTIFIED	DEIDENTIFIED	Exam-1	66	NA	NA	NA	NA									NA
DEIDENTIFIED	DEIDENTIFIED	Exam-1	94	NA	NA	NA	NA									NA
DEIDENTIFIED	DEIDENTIFIED	Exam-1	38	NA	NA	NA	NA									NA
DEIDENTIFIED	DEIDENTIFIED	Exam-1	42.5	NA	NA	NA	NA									NA
DEIDENTIFIED	DEIDENTIFIED	Exam-1	61	NA	NA	NA	NA									NA
DEIDENTIFIED	DEIDENTIFIED	Exam-1	53	NA	NA	NA	NA									NA
DEIDENTIFIED	DEIDENTIFIED	Exam-1	61	NA	NA	NA	NA									NA
DEIDENTIFIED	DEIDENTIFIED	Exam-1	84	NA	NA	NA	NA									NA
DEIDENTIFIED	DEIDENTIFIED	Exam-1	47	NA	NA	NA	NA									NA
DEIDENTIFIED	DEIDENTIFIED	Exam-1	0	NA	NA	NA	NA									NA
DEIDENTIFIED	DEIDENTIFIED	Exam-1	72	NA	NA	NA	NA									NA
DEIDENTIFIED	DEIDENTIFIED	Exam-1	85	NA	NA	NA	NA									NA
DEIDENTIFIED	DEIDENTIFIED	Exam-1	62	NA	NA	NA	NA									NA
DEIDENTIFIED	DEIDENTIFIED	Exam-1	89.5	NA	NA	NA	Online									NA
DEIDENTIFIED	DEIDENTIFIED	Exam-1	63.5	NA	NA	NA	Online									NA
DEIDENTIFIED	DEIDENTIFIED	Exam-1	69	NA	NA	NA	Online									NA
DEIDENTIFIED	DEIDENTIFIED	Exam-1	86	0.161116774	-2.852027956	1.222680035	Online	2	4	1	16		15	3	7	31-50%	3	3	Electronically	20	1	1	1	2	2
DEIDENTIFIED	DEIDENTIFIED	Exam-1	78.5	0.607315483	-1.805070735	0.715737835	Online	2	4	1	16		8	5	6	51-70%	4	5	Electronically	19	1	2	2	2	2
DEIDENTIFIED	DEIDENTIFIED	Exam-1	68	0.197372	0.154100977	1.461210272	Online	2	2	2	15		5	6	5	71-100%	5	2	I did not ask questions at all	19	1	2	2	2	2
DEIDENTIFIED	DEIDENTIFIED	Exam-1	62	NA	NA	NA	Online									NA
DEIDENTIFIED	DEIDENTIFIED	Exam-1	69	0.113578232	-0.779580146	-1.273109551	Online	2	2	1	3	40	10	2	7	31-50%	3	5	I did not ask questions at all	24	1	1	1	1	1
DEIDENTIFIED	DEIDENTIFIED	Exam-1	86	-0.250106488	1.609176933	-0.410877269	Online	4	4	2	17		3	2	4	51-70%	4	1	Electronically	20	1	1	1	1	1
DEIDENTIFIED	DEIDENTIFIED	Exam-1	72	-0.009264771	-1.717725857	-0.110992371	Online	2	2	1	14		15	3	6	51-70%	4	3	I did not ask questions at all	19	1	1	1	2	2
DEIDENTIFIED	DEIDENTIFIED	Exam-1	72	-0.219360164	1.057683325	0.165098169	Online	2	2	2	14		3	5	4	51-70%	4	3	Electronically	19	1	1	1	2	2
DEIDENTIFIED	DEIDENTIFIED	Exam-1	68	-1.463474355	1.5632722	0.770535072	Online	3	4	2	14	20		7	2	71-100%	5	5	I did not ask questions at all	21	1	1	1	2	2
DEIDENTIFIED	DEIDENTIFIED	Exam-1	73.5	NA	NA	NA	Online									NA
DEIDENTIFIED	DEIDENTIFIED	Exam-1	92	0.543601575	-2.114503222	1.030314933	Online	2	3	2	15		5	2	5	71-100%	5	2	I did not ask questions at all	19	1	2	2	2	2
DEIDENTIFIED	DEIDENTIFIED	Exam-1	74.28	0.342425943	1.717988444	-1.803792771	Online	2	3	1	12			7	3	51-70%	4	1		20	1	1	1	2	2
DEIDENTIFIED	DEIDENTIFIED	Exam-1	67.5	0.656296119	0.608124445	-0.678309639	Online	1	3	4	17		24	6	4	<10%	1	3	I did not ask questions at all	20	1	1	1	2	2
DEIDENTIFIED	DEIDENTIFIED	Exam-1	38.5	NA	NA	NA	Online									NA
DEIDENTIFIED	DEIDENTIFIED	Exam-1	61	0.836163194	-3.635457424	1.461210272	Online	1	1	1	15	20	15	7	7	10-30%	2	5	I did not ask questions at all	19	1	2	2	2	2
DEIDENTIFIED	DEIDENTIFIED	Exam-1	65	0.003173422	0.671031223	-0.170347668	Online	2	2	1	11			1	4	31-50%	3	3	I did not ask questions at all	21	1	2	2	2	2
DEIDENTIFIED	DEIDENTIFIED	Exam-1	66	NA	NA	NA	Online									NA
DEIDENTIFIED	DEIDENTIFIED	Exam-1	75	0.506396203	1.45446069	1.461210272	Online	2	3	2	13	0	7	3	6	<10%	1	2	I did not ask questions at all	19	1	1	1	2	2
DEIDENTIFIED	DEIDENTIFIED	Exam-1	73.5	NA	NA	NA	Online									NA
DEIDENTIFIED	DEIDENTIFIED	Exam-1	52	NA	NA	NA	Online									NA
DEIDENTIFIED	DEIDENTIFIED	Exam-1	71	-0.438508948	-0.392928044	-0.562110982	Online	4	4	4	15	0	2	1	1	31-50%	3	5	I did not ask questions at all	19	1	1	1	2	2
DEIDENTIFIED	DEIDENTIFIED	Exam-1	101	-0.909919022	1.5632722	0.346831804	Online	1	4	1	15		10	5	5	71-100%	5	5	I did not ask questions at all	19	1	2	2	1	1
DEIDENTIFIED	DEIDENTIFIED	Exam-1	60	0.039599628	-1.192163469	1.032361056	Online	1	1	1	15			1	1	<10%	1	1	Small Groups	20	1	1	1	1	1
DEIDENTIFIED	DEIDENTIFIED	Exam-1	71.5	-0.199396542	0.417628731	-0.477412531	Online	4	5	1	15	0	10	5	6	71-100%	5	4	I did not ask questions at all	20	1	2	2	2	2
DEIDENTIFIED	DEIDENTIFIED	Exam-1	74.5	-0.404474981	-1.296510392	-0.954353421	Online	2	2	2	14		20	4	5	10-30%	2	3	I did not ask questions at all	19	1	1	1	2	2
DEIDENTIFIED	DEIDENTIFIED	Exam-1	68	-0.883149327	1.717988444	-0.617008316	Online	4	3	4	17		5	7	3	10-30%	2	2	I did not ask questions at all	19	1	2	2	2	2
DEIDENTIFIED	DEIDENTIFIED	Exam-1	46.5	NA	NA	NA	Online									NA
DEIDENTIFIED	DEIDENTIFIED	Exam-1	64	-0.005361963	1.717988444	0.243750485	Online	4	4	2	18	15	23	5	5	31-50%	3	4	I did not ask questions at all	19	1	2	2	1	1
DEIDENTIFIED	DEIDENTIFIED	Exam-1	85	0.660764696	1.609176933	0.991828375	Online	1	1	2	3	0	6	5	4	71-100%	5	4	I did not ask questions at all	19	1	1	1	2	2
DEIDENTIFIED	DEIDENTIFIED	Exam-1	93	0.40245044	1.717988444	1.125277928	Online	2	4	1	15	0	8	5	4	71-100%	5	2	Electronically and Small Groups	20	1	1	1	1	1
DEIDENTIFIED	DEIDENTIFIED	Exam-1	68	-0.217417456	1.717988444	1.365807529	Online	2	4	2	14	20	25	7	3	71-100%	5	2	Small Groups	20	1	1	1	2	2
DEIDENTIFIED	DEIDENTIFIED	Exam-1	71.5	0.769940809	1.717988444	1.04155249	Online	2	2	1	17		9	5	5	31-50%	3	3	I did not ask questions at all	19	1	2	2	2	2
DEIDENTIFIED	DEIDENTIFIED	Exam-1	84.5	NA	NA	NA	Online									NA
DEIDENTIFIED	DEIDENTIFIED	Exam-1	68	-0.735021138	-1.538571513	-2.694025141	Online	2	3	2	14		10	4	4	<10%	1	4	I did not ask questions at all	20	1	2	2	2	2
DEIDENTIFIED	DEIDENTIFIED	Exam-1	69	-1.698118184	1.717988444	-2.549971393	Online	4	4	2	15		0	1	1	10-30%	2	5	I did not ask questions at all	20	1	1	1	1	1
DEIDENTIFIED	DEIDENTIFIED	Exam-1	73	0.440173818	0.608124445	0.349317675	Online	2	2	2	14	0		7	5	51-70%	4	4	Small Groups	19	1	2	2	2	2
DEIDENTIFIED	DEIDENTIFIED	Exam-1	66	-0.087481163	-1.451226635	0.677571443	Online	2	2	1	18	12	6	5	5	51-70%	4	1	I did not ask questions at all	20	1	2	2	2	2
DEIDENTIFIED	DEIDENTIFIED	Exam-1	65.7	0.653008477	1.408555957	1.029875185	Online	2	2	1	18		7	2	5	51-70%	4	4	I did not ask questions at all	19	1	1	1	2	2
DEIDENTIFIED	DEIDENTIFIED	Exam-1	60	NA	NA	NA	Online									NA
DEIDENTIFIED	DEIDENTIFIED	Exam-1	80.11	0.546110051	0.477846301	1.365807529	Online	2	2	1	15		20	4	6	71-100%	5	3	Electronically	19	1	2	2	2	2
DEIDENTIFIED	DEIDENTIFIED	Exam-1	75.5	0.148391364	1.45446069	-1.610601511	Online	2	2	2	13		0	4	6	51-70%	4	5	Electronically	20	1	2	2	2	2
DEIDENTIFIED	DEIDENTIFIED	Exam-1	74	0.836163194	1.717988444	1.461210272	Online	2	3	1	14	15	15	7	5	10-30%	2	4	Electronically		1	1	1	2	2
DEIDENTIFIED	DEIDENTIFIED	Exam-1	82	NA	NA	NA	Online									NA
DEIDENTIFIED	DEIDENTIFIED	Exam-1	48	NA	NA	NA	Online									NA
DEIDENTIFIED	DEIDENTIFIED	Exam-1	81.5	NA	NA	NA	Online									NA
DEIDENTIFIED	DEIDENTIFIED	Exam-1	91	0.424160766	1.500365423	-0.17378835	Online	4	4	1	15		12	7	2	51-70%	4	2	I did not ask questions at all	19	1	1	1	1	1
DEIDENTIFIED	DEIDENTIFIED	Exam-1	97	-0.011773247	0.045289466	1.223166542	Online	2	4	2	16	0	3	7	5	51-70%	4	5	Electronically	20	1	1	1	2	2
DEIDENTIFIED	DEIDENTIFIED	Exam-1	89	0.836163194	0.695469323	1.461210272	Online	2	2	1	15		5	1	6	51-70%	4	2	I did not ask questions at all	20	1	1	1	2	2
DEIDENTIFIED	DEIDENTIFIED	Exam-1	65.5	NA	NA	NA	Online									NA
DEIDENTIFIED	DEIDENTIFIED	Exam-1	54.5	0.586786092	1.717988444	0.411187399	Online	2	3	1	15	12	0	5	4	<10%	1	5	I did not ask questions at all	19	1	2	2	2	2
DEIDENTIFIED	DEIDENTIFIED	Exam-1	87	NA	NA	NA	Online									NA
DEIDENTIFIED	DEIDENTIFIED	Exam-1	58	-0.351543775	1.067808588	0.406174996	Online	2	3	1	12	0	0	3	4	31-50%	3	3	I did not ask questions at all	21	1	2	2	1	1
DEIDENTIFIED	DEIDENTIFIED	Exam-1	86.5	NA	NA	NA	Online									NA
DEIDENTIFIED	DEIDENTIFIED	Exam-1	51	-0.737316218	-0.443297364	0.111374042	Online	4	4	1	16	15	8	6	1	<10%	1	3	I did not ask questions at all	19	1	2	2	2	2
DEIDENTIFIED	DEIDENTIFIED	Exam-1	95	NA	NA	NA	Online									NA
DEIDENTIFIED	DEIDENTIFIED	Exam-1	46	-1.507986413	-2.124351472	-2.134900227	Online	2	2	2	14	10		2	2	10-30%	2	2	I did not ask questions at all	20	2	1	1	1	1
DEIDENTIFIED	DEIDENTIFIED	Exam-1	64	NA	NA	NA	Online									NA
DEIDENTIFIED	DEIDENTIFIED	Exam-1	65.5	NA	NA	1.461210272	Online	2	2	2	14	0	12	4	4	51-70%	4	5	Electronically	19	1	1	1	2	2
DEIDENTIFIED	DEIDENTIFIED	Exam-1	65	-0.27063588	1.717988444	-0.415290963	Online	2	2	1	16	20	2	7	4	51-70%	4	5	Electronically and Small Groups	22	1	1	1	1	1
DEIDENTIFIED	DEIDENTIFIED	Exam-1	54	0.130370449	0.460561996	0.435042477	Online	4	4	1	12	0	4	6	6	51-70%	4	4	I did not ask questions at all	20	1	1	1	2	2
DEIDENTIFIED	DEIDENTIFIED	Exam-1	56	NA	NA	NA	Online									NA
DEIDENTIFIED	DEIDENTIFIED	Exam-1	76.5	0.721739339	0.045289466	1.128690054	Online	1	2	1	17		11	4	5	31-50%	3	2	Electronically	18	1	1	1	1	1
DEIDENTIFIED	DEIDENTIFIED	Exam-1	74	0.551357794	-0.61798712	1.222680035	Online	1	2	2	14		10	5	4	31-50%	3	1	I did not ask questions at all		1	1	1	1	1
DEIDENTIFIED	DEIDENTIFIED	Exam-1	75	-0.183884103	0.439095364	-2.09506016	Online	2	2	1	14		0	2	5	31-50%	3	2	I did not ask questions at all	19	1	1	1	2	2
DEIDENTIFIED	DEIDENTIFIED	Exam-1	76.5	0.120671523	0.499312934	0.770535072	Online	2	2	1	16		5	3	5	71-100%	5	3	I did not ask questions at all	20	1	2	2	2	2
DEIDENTIFIED	DEIDENTIFIED	Exam-1	68.5	NA	NA	NA	Online									NA
DEIDENTIFIED	DEIDENTIFIED	Exam-1	68	-0.452013523	0.042317999	-2.299377442	Online	5	5	2	15	0	10	1	6	51-70%	4	3	I did not ask questions at all	20	1	2	2	2	2
DEIDENTIFIED	DEIDENTIFIED	Exam-1	82	0.332940413	-0.196771655	0.790271839	Online	2	2	1	14	0	10	3	5	51-70%	4	4	I did not ask questions at all	20	1	1	1	2	2
DEIDENTIFIED	DEIDENTIFIED	Exam-1	83	0.836163194	-0.087960145	0.711619523	Online	4	4	3	18			4	5	31-50%	3	4	Electronically	22	1	1	1	2	2
DEIDENTIFIED	DEIDENTIFIED	Exam-1	106	NA	NA	NA	Online									NA
DEIDENTIFIED	DEIDENTIFIED	Exam-1	82	0.562353892	1.408555957	1.461210272	Online	1	2	4	17	0	2	3	6	51-70%	4	5	I did not ask questions at all	19	1	1	1	2	2
DEIDENTIFIED	DEIDENTIFIED	Exam-1	77	NA	NA	NA	Online									NA
DEIDENTIFIED	DEIDENTIFIED	Exam-1	75	-0.025064426	0.221472342	-0.194644983	Online	2	4	1	12	15	5	7	5	31-50%	3	4	I did not ask questions at all	20	1	1	1	1	1
DEIDENTIFIED	DEIDENTIFIED	Exam-1	86	0.441950892	-2.076968391	1.461210272	Online	1	1	1	14	0		1	1	51-70%	4	2	Electronically	20	1	2	2	2	2
DEIDENTIFIED	DEIDENTIFIED	Exam-1	51.5	-0.257862707	-0.066493512	-0.477412531	Online	2	2	1	17	0	0	2	4	31-50%	3	5	Electronically	19	1	1	1	2	2
DEIDENTIFIED	DEIDENTIFIED	Exam-1	44.5	-0.348517292	1.717988444	-1.592878071	Online	4	3	2	18	1	10	7	3	10-30%	2	3	Small Groups	21	1	2	2	2	2
DEIDENTIFIED	DEIDENTIFIED	Exam-1	57	-0.374795039	-0.087960145	-1.042683677	Online	1	2	2	16		10	5	4	31-50%	3	3	Electronically	24	1	1	1	1	1
DEIDENTIFIED	DEIDENTIFIED	Exam-1	91	NA	NA	NA	Online									NA
DEIDENTIFIED	DEIDENTIFIED	Exam-1	64	NA	NA	NA	Online									NA
DEIDENTIFIED	DEIDENTIFIED	Exam-1	60	NA	NA	NA	Online									NA
DEIDENTIFIED	DEIDENTIFIED	Exam-1	68	-0.954602061	-0.087960145	-2.336676832	Online	4	2	1	14	15	3	4	5	<10%	1	3	I did not ask questions at all	20	1	1	1	2	2
DEIDENTIFIED	DEIDENTIFIED	Exam-1	86	NA	NA	NA	Online									NA
DEIDENTIFIED	DEIDENTIFIED	Exam-1	64	0.145882888	1.500365423	0.024089623	Online	2	3	1	15		3	3	5	31-50%	3	2	I did not ask questions at all	19	1	2	2	2	2
DEIDENTIFIED	DEIDENTIFIED	Exam-1	67	NA	NA	NA	Online									NA
DEIDENTIFIED	DEIDENTIFIED	Exam-1	70	-0.077995632	0.695469323	0.887234198	Online	2	2	4	13	10	5	7	4	31-50%	3	1	Electronically	18	1	2	2	1	1
DEIDENTIFIED	DEIDENTIFIED	Exam-1	67	-0.915838359	-1.968156881	-0.713337314	Online	4	2	1	16		5	6	4	31-50%	3	2	Electronically	19	1	2	2	2	2
DEIDENTIFIED	DEIDENTIFIED	Exam-1	84.5	-0.989816963	0.130878984	-1.1507507	Online	3	3	5	14		11	7	3	<10%	1	3	I did not ask questions at all	19	1	2	2	2	2
DEIDENTIFIED	DEIDENTIFIED	Exam-1	69	0.099410729	-1.166232248	-0.948913375	Online	3	3	3	14		10	3	3	31-50%	3	3	Electronically	20	1	1	1	1	1
DEIDENTIFIED	DEIDENTIFIED	Exam-1	60	-0.208882072	-0.066493512	-0.275355527	Online	1	2	1	14	10	4	4	4	51-70%	4	4	I did not ask questions at all	19	1	2	2	1	1
DEIDENTIFIED	DEIDENTIFIED	Exam-1	78	0.836163194	-0.51902386	1.461210272	Online	4	4	1	15		32	7	4	<10%	1	2	I did not ask questions at all	19	1	1	1	2	2
DEIDENTIFIED	DEIDENTIFIED	Exam-1	77	-0.324085093	1.717988444	-1.398352788	Online	1	4	4	16	10	20	4	3	<10%	1	3	I did not ask questions at all	19	1	1	1	2	2
DEIDENTIFIED	DEIDENTIFIED	Exam-1	70	0.665781649	1.717988444	0.463530929	Online	1	2	1	13		2	7	6	10-30%	2	3	I did not ask questions at all	20	1	1	1	2	2
DEIDENTIFIED	DEIDENTIFIED	Exam-1	68	-0.942346895	1.717988444	-1.004636867	Online	2	5	3	12	18	15	5	3	<10%	1	3	I did not ask questions at all	20	1	2	2	2	2
DEIDENTIFIED	DEIDENTIFIED	Exam-1	61	0.370711554	-1.666160449	-2.376356083	Online	2	4	1	14	40	10	7	5	31-50%	3	2	I did not ask questions at all	19	1	1	1	2	2
DEIDENTIFIED	DEIDENTIFIED	Exam-1	69	0.186328139	-1.826537368	0.580169335	Online	1	1	1	14	0	14	2	7	71-100%	5	2	Electronically	20	1	2	2	2	2
DEIDENTIFIED	DEIDENTIFIED	Exam-1	51	NA	NA	NA	Online									NA
DEIDENTIFIED	DEIDENTIFIED	Exam-1	51.5	NA	NA	NA	Online									NA
DEIDENTIFIED	DEIDENTIFIED	Exam-1	41	NA	NA	NA	Online									NA
DEIDENTIFIED	DEIDENTIFIED	Exam-1	104	0.780205505	-0.175305023	0.232559686	Online	2	2	2	14	12	1	6	6	31-50%	3	3	Electronically	20	1	1	1	2	2
DEIDENTIFIED	DEIDENTIFIED	Exam-1	75	-0.053186038	-2.852027956	0.780652761	Online	2	4	1	16		15	7	7	71-100%	5	2	I did not ask questions at all	19	1	2	2	2	2
DEIDENTIFIED	DEIDENTIFIED	Exam-1	62	-0.067068008	1.067808588	-2.214478798	Online	3	3	2	16	0	14	3	3	10-30%	2	4	In person	19	1	1	1	2	2
DEIDENTIFIED	DEIDENTIFIED	Exam-1	54	-0.527203432	-1.113450733	-0.752530058	Online	2	2	2	12	31	20	7	7	71-100%	5	3	I did not ask questions at all	21	1	2	2	1	1
DEIDENTIFIED	DEIDENTIFIED	Exam-1	42	NA	NA	NA	Online									NA
DEIDENTIFIED	DEIDENTIFIED	Exam-1	35.25	-0.497638042	1.5632722	0.237164504	Online	2	4	1	18	14	4	5	3	51-70%	4	4	Electronically	20	1	1	1	2	2
DEIDENTIFIED	DEIDENTIFIED	Exam-1	95	0.31297679	1.500365423	0.627407579	Online	2	4	5	13		15	5	2	<10%	1	2	Electronically and Small Groups	20	1	2	2	2	2
DEIDENTIFIED	DEIDENTIFIED	Exam-1	77	0.350182162	1.717988444	-0.420496347	Online	1	4	2	14	0	13	3	3	10-30%	2	2	I did not ask questions at all	21	1	1	1	1	1
DEIDENTIFIED	DEIDENTIFIED	Exam-1	78	0.237603855	0.431941569	-2.011935287	Online	2	2	1	16	0	20	7	4	31-50%	3	2	I did not ask questions at all	19	1	2	2	2	2
DEIDENTIFIED	DEIDENTIFIED	Exam-1	86	NA	NA	NA	Online									NA
DEIDENTIFIED	DEIDENTIFIED	Exam-1	100	0.283296848	-2.533963327	1.125277928	Online	2	3	1	15	10	10	6	7	NA		5	I did not ask questions at all	19	1	1	1	2	2
DEIDENTIFIED	DEIDENTIFIED	Exam-1	52	NA	NA	NA	Online									NA
DEIDENTIFIED	DEIDENTIFIED	Exam-1	87	-0.605650613	-1.742163957	-0.939235435	Online	4	4	2	12	10	3	5	4	31-50%	3	2	I did not ask questions at all	20	1	1	1	1	1
DEIDENTIFIED	DEIDENTIFIED	Exam-1	92	-0.165478812	-2.259094203	-0.141480187	Online	3	4	2	14					10-30%	2	5	Electronically	19	1	1	1	2	2
DEIDENTIFIED	DEIDENTIFIED	Exam-1	51	-0.180383065	1.717988444	-0.928484385	Online	2	4	2	13		6	7	2	<10%	1	3	I did not ask questions at all	19	1	1	1	1	1
DEIDENTIFIED	DEIDENTIFIED	Exam-1	64	0.127861973	1.717988444	0.674645823	Online	2	4	2	18		3	6	4	51-70%	4	4	I did not ask questions at all	19	1	1	1	2	2
DEIDENTIFIED	DEIDENTIFIED	Exam-1	54.5	NA	NA	NA	Online									NA
DEIDENTIFIED	DEIDENTIFIED	Exam-1	33	NA	NA	NA	Online									NA
DEIDENTIFIED	DEIDENTIFIED	Exam-1	89	-0.052218498	-1.067546	-0.053149931	Online	4	3	2	13	15	6	6	4	51-70%	4	3	I did not ask questions at all	19	1	2	2	2	2
DEIDENTIFIED	DEIDENTIFIED	Exam-1	82	-0.67104607	-1.584476246	-0.454970214	Online	4	4	3	12		7	5	3	51-70%	4	5	I did not ask questions at all	19	1	1	1	2	2
DEIDENTIFIED	DEIDENTIFIED	Exam-1	89	-0.219360164	1.717988444	-0.170286949	Online	3	3	2	16		2	6	3	NA		3	I did not ask questions at all	19	1	1	1	1	1
DEIDENTIFIED	DEIDENTIFIED	Exam-1	74	0.168872993	0.428970101	-1.962697679	Online	2	4	4	17	0	8	5	6	NA		2	I did not ask questions at all	19	1	1	1	1	1
DEIDENTIFIED	DEIDENTIFIED	Exam-1	59.5	-0.167871052	1.5632722	0.647144346	Online	2	4	1	18	10	2	7	2	51-70%	4	2	I did not ask questions at all		1	1	1	2	2
DEIDENTIFIED	DEIDENTIFIED	Exam-1	69	-0.077995632	1.717988444	-0.072459054	Online	4	5	2	16		5	5	3	10-30%	2	1		20	1	1	1	2	2
DEIDENTIFIED	DEIDENTIFIED	Exam-1	68	-0.080504109	1.717988444	-1.388335195	Online	2	2	1	14		4	5	4	51-70%	4	2	Electronically and In person		1	2	2	1	1
DEIDENTIFIED	DEIDENTIFIED	Exam-1	97	-0.144218017	1.500365423	1.175928298	Online	2	2	1	12		10	3	4	51-70%	4	1	Electronically	19	1	1	1	2	2
DEIDENTIFIED	DEIDENTIFIED	Exam-1	80	-0.10862572	-0.407240881	1.461210272	Online	4	4	1	18	10		7	5	10-30%	2	3	Electronically	19	2	1	1	2	2
DEIDENTIFIED	DEIDENTIFIED	Exam-1	69	-0.716007661	-0.95873449	-0.994519178	Online	3	4	2	16	9	2	5	4	31-50%	3	5	I did not ask questions at all	22	1	2	2	1	1
DEIDENTIFIED	DEIDENTIFIED	Exam-1	46.5	-1.255321669	1.717988444	-0.606743772	Online	4	4	1	14	20	20	7	7	10-30%	2	5	I did not ask questions at all	19	1	2	2	2	2
DEIDENTIFIED	DEIDENTIFIED	Exam-1	51	-0.142659687	1.717988444	-0.188231925	Online	2	3	3	15		2	7	3	51-70%	4	5	I did not ask questions at all	20	1	2	2	2	2
DEIDENTIFIED	DEIDENTIFIED	Exam-1	46.5	-0.322124992	1.222524831	-1.41411624	Online	2	3	2	12			4	5	<10%	1	1	I did not ask questions at all	22	1	1	1	1	1
DEIDENTIFIED	DEIDENTIFIED	Exam-1	59.5	NA	NA	NA	Online									NA
DEIDENTIFIED	DEIDENTIFIED	Exam-1	69	-0.387019836	-1.584476246	-1.09036167	Online	2	1	1	13	10		4	7	31-50%	3	2	I did not ask questions at all	19	1	2	2	2	2
DEIDENTIFIED	DEIDENTIFIED	Exam-1	63	0.014217283	1.717988444	0.655896031	Online	1	2	2	14	0	24	7	7	51-70%	4	4	Small Groups		1	2	2	1	1
DEIDENTIFIED	DEIDENTIFIED	Exam-1	61	0.307729048	-3.635457424	-0.195630101	Online	1	2	2	14	15	0	7	6	51-70%	4	2	Small Groups	19	1	1	1	1	1
DEIDENTIFIED	DEIDENTIFIED	Exam-1	74	-0.404474981	1.212399568	-0.351035465	Online	2	2	2	16	12	20	6	4	51-70%	4	2		20	1	1	2	2	2
DEIDENTIFIED	DEIDENTIFIED	Exam-1	58.5	NA	NA	NA	Online									NA
DEIDENTIFIED	DEIDENTIFIED	Exam-1	68.5	0.213834584	0.741374056	-0.368612051	Online	5	5	5	14		30	5	5	<10%	1	2	I did not ask questions at all	20	1	1	1	2	2
DEIDENTIFIED	DEIDENTIFIED	Exam-1	77	0.307729048	1.717988444	0.981663928	Online	3	4	3	16			7	5	51-70%	4	2	Small Groups	22	2	2	2	2	2
DEIDENTIFIED	DEIDENTIFIED	Exam-1	83	-0.036205447	-1.913882246	0.85426051	Online	1	2	2	13	30	0	7	7	51-70%	4	3	I did not ask questions at all	19	1	2	2	2	2
DEIDENTIFIED	DEIDENTIFIED	Exam-1	31	NA	NA	NA	Online									NA
DEIDENTIFIED	DEIDENTIFIED	Exam-2	80	NA	NA	NA	Face to Face									NA
DEIDENTIFIED	DEIDENTIFIED	Exam-2	82	-0.474935154	1.717988444	-0.984354731	Face to Face	2	4	2	13	15	6	7	2	10-30%	2	3	I did not ask questions at all	20	1	1	1	2	2
DEIDENTIFIED	DEIDENTIFIED	Exam-2	114	0.551357794	-1.968156881	1.271331041	Face to Face	2	2	1	12			2	7	71-100%	5	5	Electronically	20	1	2	2	2	2
DEIDENTIFIED	DEIDENTIFIED	Exam-2	76	NA	NA	NA	Face to Face									NA
DEIDENTIFIED	DEIDENTIFIED	Exam-2	64	0.721739339	0.572344975	1.318569285	Face to Face	1	2	2	18		20	5	5	31-50%	3	3	Electronically, In person, and Small Groups	19	1	2	2	2	2
DEIDENTIFIED	DEIDENTIFIED	Exam-2	64	0.395875156	1.717988444	0.762976079	Face to Face	4	4	1	13		8	7	2	10-30%	2	5	I did not ask questions at all	19	1	2	1	1	2
DEIDENTIFIED	DEIDENTIFIED	Exam-2	80.5	0.668290126	-2.907780939	0.011325246	Face to Face	1	1	1	15		4	1	6	51-70%	4	2	I did not ask questions at all	19	1	1	1	2	2
DEIDENTIFIED	DEIDENTIFIED	Exam-2	70.5	-0.219360164	1.057683325	0.165098169	Face to Face	2	2	2	14		3	5	4	51-70%	4	3	Electronically	19	1	1	1	2	2
DEIDENTIFIED	DEIDENTIFIED	Exam-2	77.5	0.492891628	1.500365423	0.13927589	Face to Face	2	2	1	13	3	2	5	4	10-30%	2	3	I did not ask questions at all	19	1	1	1	2	2
DEIDENTIFIED	DEIDENTIFIED	Exam-2	60.5	0.668290126	-3.635457424	-0.042338161	Face to Face	5	5	1	17	36	10	7	5	51-70%	4	2	I did not ask questions at all	21	1	1	1	1	1
DEIDENTIFIED	DEIDENTIFIED	Exam-2	93	0.589294568	-2.488058594	0.483693482	Face to Face	1	2	1	16	13	5	7	5	51-70%	4	1	I did not ask questions at all	20	1	2	2	2	2
DEIDENTIFIED	DEIDENTIFIED	Exam-2	57	-0.657541495	1.717988444	1.270404786	Face to Face	2	2	1	15		4	5	5	31-50%	3	4	Electronically	20	1	1	1	2	2
DEIDENTIFIED	DEIDENTIFIED	Exam-2	56	NA	NA	NA	Face to Face									NA
DEIDENTIFIED	DEIDENTIFIED	Exam-2	92	0.515315964	-3.235708591	1.413972028	Face to Face	2	2	2	16		8	5	6	71-100%	5	5	Electronically	20	1	1	1	2	2
DEIDENTIFIED	DEIDENTIFIED	Exam-2	88.5	-0.286763484	-0.530642242	-0.207468223	Face to Face	2	2	2	14		10	6	5	31-50%	3	2	Electronically	19	1	1	1	2	2
DEIDENTIFIED	DEIDENTIFIED	Exam-2	61	-0.025277822	0.431941569	-1.292932452	Face to Face	2	4	1	15	20	5	6	4	51-70%	4	5	I did not ask questions at all		1	1	1	1	1
DEIDENTIFIED	DEIDENTIFIED	Exam-2	65	0.158608297	0.801309366	0.484766592	Face to Face	2	2	1	14	0	6	5	5	<10%	1	3	I did not ask questions at all	19	1	2	2	1	1
DEIDENTIFIED	DEIDENTIFIED	Exam-2	117	0.612332437	-1.594601509	1.461210272	Face to Face	1	1	1	14		2	2	4	71-100%	5	4	Electronically	20	1	2	2	1	1
DEIDENTIFIED	DEIDENTIFIED	Exam-2	83.5	-0.829652351	-1.693287757	-0.436220422	Face to Face	1	1	3	14		10	3	5	10-30%	2	2	I did not ask questions at all	19	1	1	1	2	2
DEIDENTIFIED	DEIDENTIFIED	Exam-2	85.5	NA	NA	NA	Face to Face									NA
DEIDENTIFIED	DEIDENTIFIED	Exam-2	104	0.134839027	-0.93429639	0.386877978	Face to Face	1	2	2	15	0	3	5	5	71-100%	5	5	Small Groups	20	1	1	1	2	2
DEIDENTIFIED	DEIDENTIFIED	Exam-2	103	0.015946594	-0.000615266	0.356876668	Face to Face	1	2	2	18		7	3	6	10-30%	2	2	I did not ask questions at all	20	1	1	1	2	2
DEIDENTIFIED	DEIDENTIFIED	Exam-2	73	-0.265618927	-1.76363059	0.176188871	Face to Face	2	2	1	14	5	5	6	4	31-50%	3	3	Electronically	19	1	1	1	2	2
DEIDENTIFIED	DEIDENTIFIED	Exam-2	95	NA	NA	NA	Face to Face									NA
DEIDENTIFIED	DEIDENTIFIED	Exam-2	83.5	0.338523135	-0.351487899	0.59849334	Face to Face	1	2	2	17		8	6	5	31-50%	3	2	Electronically	20	1	1	1	1	1
DEIDENTIFIED	DEIDENTIFIED	Exam-2	74.5	-0.387799001	1.253839714	-2.701584134	Face to Face	4	5	2	14		3	6	5	10-30%	2	1	I did not ask questions at all	19	1	1	1	1	1
DEIDENTIFIED	DEIDENTIFIED	Exam-2	82	0.237603855	0.28437912	0.011925812	Face to Face	3	2	1	18		3	4	6	NA		3	Electronically	20	1	1	1	2	2
DEIDENTIFIED	DEIDENTIFIED	Exam-2	68.5	-0.146678732	0.871652199	0.263959796	Face to Face	2	3	1	9	8		5	2	31-50%	3	3	Electronically	23	1	2	2	2	2
DEIDENTIFIED	DEIDENTIFIED	Exam-2	73.5	-0.313820397	0.112660832	-1.870340138	Face to Face	2	1	2	17		10	6	5	<10%	1	4	I did not ask questions at all	19	1	2	2	2	2
DEIDENTIFIED	DEIDENTIFIED	Exam-2	59.5	NA	NA	NA	Face to Face									NA
DEIDENTIFIED	DEIDENTIFIED	Exam-2	70	0.660764696	-0.477583714	0.873496808	Face to Face	2	1	1	11		5	1	5	31-50%	3	5	I did not ask questions at all	19	1	1	1	2	2
DEIDENTIFIED	DEIDENTIFIED	Exam-2	34	NA	NA	NA	Face to Face									NA
DEIDENTIFIED	DEIDENTIFIED	Exam-2	99.5	0.360045088	-3.48074118	0.216953337	Face to Face	1	2	1	15	40		7	7	10-30%	2	2	I did not ask questions at all	21	1	1	1	1	1
DEIDENTIFIED	DEIDENTIFIED	Exam-2	102.5	NA	NA	NA	Face to Face									NA
DEIDENTIFIED	DEIDENTIFIED	Exam-2	101.5	0.551357794	0.20000571	0.762976079	Face to Face	2	2	2	14		2	4	4	10-30%	2	5	Electronically	19	1	1	1	2	2
DEIDENTIFIED	DEIDENTIFIED	Exam-2	70.5	0.546110051	0.477846301	1.365807529	Face to Face	2	2	1	15		20	4	6	71-100%	5	3	Electronically	19	1	2	2	2	2
DEIDENTIFIED	DEIDENTIFIED	Exam-2	65.5	-0.800203199	0.913092344	1.114026409	Face to Face	2	4	2	18	0	7	6	2	31-50%	3	1	I did not ask questions at all	21	1	2	2	1	1
DEIDENTIFIED	DEIDENTIFIED	Exam-2	72.5	0.267283797	-0.547644287	0.777607559	Face to Face	2	2	2	14	15	28	5	7	71-100%	5	2	Electronically and Small Groups	19	1	1	1	1	1
DEIDENTIFIED	DEIDENTIFIED	Exam-2	100.5	0.655516954	-2.852027956	1.327760719	Face to Face	1	2	1	18	8		4	6	71-100%	5	3	I did not ask questions at all	20	1	1	1	2	2
DEIDENTIFIED	DEIDENTIFIED	Exam-2	89	0.551357794	-1.317977024	0.27979793	Face to Face	1	2	1	14		3	5	5	71-100%	5	5	I did not ask questions at all	20	1	1	1	2	2
DEIDENTIFIED	DEIDENTIFIED	Exam-2		NA	NA	NA	Face to Face									NA
DEIDENTIFIED	DEIDENTIFIED	Exam-2	107	0.370711554	-1.739192489	0.166510931	Face to Face	2	2	1	14		3	5	5	51-70%	4	5	Electronically	19	1	1	1	2	2
DEIDENTIFIED	DEIDENTIFIED	Exam-2	50.5	-1.032270077	-0.112398245	-2.827474694	Face to Face	1	1	1	13		10	5	2	31-50%	3	5	Electronically	19	1	1	1	1	1
DEIDENTIFIED	DEIDENTIFIED	Exam-2	80	-0.292559603	0.871652199	-0.580374267	Face to Face	3	4	2	16	9	9	6	4	51-70%	4	1	Electronically	20	1	1	1	2	2
DEIDENTIFIED	DEIDENTIFIED	Exam-2	116.5	0.836163194	0.586657812	1.461210272	Face to Face	1	2	1	14		5	5	7	51-70%	4	2	Electronically and In person	19	1	1	1	2	2
DEIDENTIFIED	DEIDENTIFIED	Exam-2	95	0.347673685	0.847214099	0.86686407	Face to Face	1	1	1	13	12	4	7	5	51-70%	4	3	Electronically and Small Groups	20	1	2	2	2	2
DEIDENTIFIED	DEIDENTIFIED	Exam-2	88.5	NA	NA	NA	Face to Face									NA
DEIDENTIFIED	DEIDENTIFIED	Exam-2	96.5	0.492891628	-0.126428822	-1.314228835	Face to Face	1	1	2	13			5	6	71-100%	5	1	Electronically and Small Groups	20	1	2	2	2	2
DEIDENTIFIED	DEIDENTIFIED	Exam-2	33	0.408648328	1.717988444	-2.397652466	Face to Face	2	3	1	15		18	7	6	NA		4	I did not ask questions at all	19	1	2	2	2	2
DEIDENTIFIED	DEIDENTIFIED	Exam-2	53	NA	NA	NA	Face to Face									NA
DEIDENTIFIED	DEIDENTIFIED	Exam-2	39	0.429909122	-1.100354003	1.365807529	Face to Face	2	2	2	18	10	15	6	5	10-30%	2	5	I did not ask questions at all	19	1	1	1	2	2
DEIDENTIFIED	DEIDENTIFIED	Exam-2	69.5	-0.650612204	0.277225325	0.358889995	Face to Face	4	4	2	17		10	7	2	10-30%	2	1	I did not ask questions at all	19	1	2	2	2	2
DEIDENTIFIED	DEIDENTIFIED	Exam-2	95.5	0.325749963	-0.375925999	0.309151917	Face to Face	2	4	4	10	18	5	5	6	71-100%	5	4	I did not ask questions at all	19	1	1	1	2	2
DEIDENTIFIED	DEIDENTIFIED	Exam-2	48.5	-0.077216467	0.716935955	-0.227691496	Face to Face	2	2	2	17		5	6	3	31-50%	3	3	Electronically and Small Groups	19	1	1	1	2	2
DEIDENTIFIED	DEIDENTIFIED	Exam-2	48.5	-0.720074469	1.717988444	-0.701660009	Face to Face	4	5	2	14		12	6	2	<10%	1	1	I did not ask questions at all	21	1	1	1	2	2
DEIDENTIFIED	DEIDENTIFIED	Exam-2	94.5	NA	NA	NA	Face to Face									NA
DEIDENTIFIED	DEIDENTIFIED	Exam-2	85	0.440173818	-0.474612247	0.398555283	Face to Face	1	2	1	12		4	3	5	51-70%	4	4	Electronically and Small Groups	19	1	1	1	1	1
DEIDENTIFIED	DEIDENTIFIED	Exam-2	98.5	0.551357794	1.057683325	0.539077323	Face to Face	1	2	2	14	16	7	4	4	71-100%	5	3	I did not ask questions at all	20	1	1	1	1	1
DEIDENTIFIED	DEIDENTIFIED	Exam-2	88	0.103082747	0.789690983	-1.355081109	Face to Face	5	5	1	13	0	0	7	7	<10%	1	2	I did not ask questions at all	20	1	1	1	2	2
DEIDENTIFIED	DEIDENTIFIED	Exam-2	98.5	NA	NA	NA	Face to Face									NA
DEIDENTIFIED	DEIDENTIFIED	Exam-2	67.5	-0.146726494	NA	0.194999383	Face to Face	5	5	3	14	15	5	5	5	10-30%	2	2	I did not ask questions at all	20	1	2	2	2	2
DEIDENTIFIED	DEIDENTIFIED	Exam-2	75	0.028719766	1.717988444	0.18630656	Face to Face	2	2	2	17	0	0	7	1	71-100%	5	2	I did not ask questions at all	10	1	1	1	2	2
DEIDENTIFIED	DEIDENTIFIED	Exam-2	80	-0.133174156	0.787278788	0.706059895	Face to Face	2	2	3	14	25	5	7	5	51-70%	4	4	Electronicallyear) arJmall Grounl	24	1	1	1	2	2
DEIDENTIFIED	DEIDENTIFIED	Exam-2	46	-0.716786827	0.825747466	-0.408877905	Face to Face	2	3	2	14		25	4	5	10-30%	2	4	I did not ask questions at all	19	1	1	1	2	2
DEIDENTIFIED	DEIDENTIFIED	Exam-2	42	NA	NA	NA	Face to Face									NA
DEIDENTIFIED	DEIDENTIFIED	Exam-2	61	NA	NA	NA	Face to Face									NA
DEIDENTIFIED	DEIDENTIFIED	Exam-2	88.5	NA	NA	NA	Face to Face									NA
DEIDENTIFIED	DEIDENTIFIED	Exam-2	33	-2.268178517	-3.635457424	-2.969189426	Face to Face	1	1	1	7	17	31	1	1	NA		3	I did not ask questions at all	23	2	1	2	2	2
DEIDENTIFIED	DEIDENTIFIED	Exam-2	75.5	0.071904283	-2.476717224	-0.382009788	Face to Face	2	1	2	12		6	3	5	71-100%	5	4	I did not ask questions at all	19	1	1	1	2	2
DEIDENTIFIED	DEIDENTIFIED	Exam-2	95	0.235095378	-3.37192967	1.280522475	Face to Face	1	1	1	15	20	10	5	7	71-100%	5	5	Electronically	20	1	2	2	2	2
DEIDENTIFIED	DEIDENTIFIED	Exam-2	76.5	-0.485430639	-3.417834402	-1.263918117	Face to Face	2	4	1	15	20	16	7	7	31-50%	3	5	I did not ask questions at all	21	1	1	1	1	1
DEIDENTIFIED	DEIDENTIFIED	Exam-2	48	NA	NA	NA	Face to Face									NA
DEIDENTIFIED	DEIDENTIFIED	Exam-2	93.5	0.441950892	-2.076968391	1.461210272	Face to Face	1	1	1	14	0		1	1	51-70%	4	2	Electronically	20	1	2	2	2	2
DEIDENTIFIED	DEIDENTIFIED	Exam-2	67.5	NA	NA	NA	Face to Face									NA
DEIDENTIFIED	DEIDENTIFIED	Exam-2	89	0.120671523	0.913092344	1.318569285	Face to Face	2	2	1	14		1	2	5	71-100%	5	5	Electronicaffy	19	1	1	1	2	2
DEIDENTIFIED	DEIDENTIFIED	Exam-2	63	NA	NA	NA	Face to Face									NA
DEIDENTIFIED	DEIDENTIFIED	Exam-2	83.5	0.721739339	-0.470424672	-0.213834524	Face to Face	2	4	2	15	20	5	7	6	31-50%	3	3	Small Groups	19	1	1	1	2	2
DEIDENTIFIED	DEIDENTIFIED	Exam-2	110	-0.001508552	-1.497131368	-1.244020534	Face to Face	1	1	1	14		8	5	3	71-100%	5	5	Electronically	20	1	2	2	2	2
DEIDENTIFIED	DEIDENTIFIED	Exam-2	73	0.064148064	-0.330021266	1.461210272	Face to Face	2	3	2	14		20	5	5	31-50%	3	3	In person	19	1	1	1	2	2
DEIDENTIFIED	DEIDENTIFIED	Exam-2	90	NA	NA	NA	Face to Face									NA
DEIDENTIFIED	DEIDENTIFIED	Exam-2	66.5	0.548849317	1.717988444	0.865937815	Face to Face	2	4	3	15	0	1	6	4	51-70%	4	5	Electronically and Small Groups	19	1	1	1	2	2
DEIDENTIFIED	DEIDENTIFIED	Exam-2	50.5	0.153073337	0.791184103	NA	Face to Face	3	3	1	14	18		7	4	31-50%	3	3	I did not ask questions at all	20	1	2	2	2	2
DEIDENTIFIED	DEIDENTIFIED	Exam-2	75	-0.034763353	0.671031223	0.263473289	Face to Face	2	2	2	14			1	3	51-70%	4	3	I did not ask questions at all	19	1	1	1	2	2
DEIDENTIFIED	DEIDENTIFIED	Exam-2	82	NA	NA	NA	Face to Face									NA
DEIDENTIFIED	DEIDENTIFIED	Exam-2	51	-1.319035578	1.717988444	-0.11206548	Face to Face	5	3	4	17	20	3	5	4	<10%	1	1	Electronically	19	1	1	1	2	2
DEIDENTIFIED	DEIDENTIFIED	Exam-2	60.5	-0.126197103	0.958997077	-1.740757053	Face to Face	2	2	1	9		5	2	4	71-100%	5	4	I did not ask questions at all	19	1	1	1	2	2
DEIDENTIFIED	DEIDENTIFIED	Exam-2	93	0.328471835	-0.392928044	1.461210272	Face to Face	2	2	2	14			1	1	NA		1	Electronically	20	1	1	1	2	2
DEIDENTIFIED	DEIDENTIFIED	Exam-2	37.5	-0.574904289	1.717988444	1.175928298	Face to Face	2	4	3	13			7	2	10-30%	2	2	Small Groups	20	1	1	1	2	2
DEIDENTIFIED	DEIDENTIFIED	Exam-2	107.5	NA	NA	NA	Face to Face									NA
DEIDENTIFIED	DEIDENTIFIED	Exam-2	78	-0.792494742	-0.042055412	-0.141480187	Face to Face	2	2	2	12		10	5	4	10-30%	2	4	I did not ask questions at all	20	1	1	1	2	2
DEIDENTIFIED	DEIDENTIFIED	Exam-2	57.5	0.660764696	1.717988444	0.934971053	Face to Face	2	5	1	14	40	15	7	4	51-70%	4	4	Electronically	20	1	1	1	2	2
DEIDENTIFIED	DEIDENTIFIED	Exam-2	97	-0.321576616	-0.846951512	-0.026841146	Face to Face	1	2	3	14	5	14	5	6	51-70%	4	3	Electronically	19	1	1	1	2	2
DEIDENTIFIED	DEIDENTIFIED	Exam-2	34.5	-0.584342056	-0.087960145	-0.484971524	Face to Face	2	2	2	14	0	10	5	4	10-30%	2	1	Electronically		1	2	2	1	1
DEIDENTIFIED	DEIDENTIFIED	Exam-2	99	0.663273173	-0.327049798	1.220680671	Face to Face	1	2	2	16		15	5	5	51-70%	4	3	Electronically	19	1	1	1	2	2
DEIDENTIFIED	DEIDENTIFIED	Exam-2	105	NA	NA	NA	Face to Face									NA
DEIDENTIFIED	DEIDENTIFIED	Exam-2	40	0.203569888	1.717988444	1.080039048	Face to Face	2	2	2	14	0	10	6	5	51-70%	4	1	I did not ask questions at all	19	1	2	2	2	2
DEIDENTIFIED	DEIDENTIFIED	Exam-2	35	-0.138970275	0.231597605	-1.267843448	Face to Face	2	4	3	12	20	25	7	2	10-30%	2	4	Small Groups		1	1	1	1	1
DEIDENTIFIED	DEIDENTIFIED	Exam-2	95	0.063368899	-2.730119715	0.089551775	Face to Face	2	2	1	15	6	4	3	5	51-70%	4	4	I did not ask questions at all	20	1	2	2	2	2
DEIDENTIFIED	DEIDENTIFIED	Exam-2	40.5	NA	NA	NA	Face to Face									NA
DEIDENTIFIED	DEIDENTIFIED	Exam-2	81.5	-0.000729386	-0.980201122	-0.015589628	Face to Face	2	2	2	14	18	4	5	4	51-70%	4	1	Electronically and Small Groupr	19	1	1	1	2	2
DEIDENTIFIED	DEIDENTIFIED	Exam-2	68.5	0.304489168	-2.897932689	-0.82231663	Face to Face	1	4	1	14		20	4	6	51-70%	4	3	I did not ask questions at all	19	1	2	2	2	2
DEIDENTIFIED	DEIDENTIFIED	Exam-2	86.5	0.533336879	-3.238680059	1.318569285	Face to Face	1	1	1	12	0	0	2	6	71-100%	5	1	Electronically	19	1	2	2	2	2
DEIDENTIFIED	DEIDENTIFIED	Exam-2	60	NA	NA	NA	Face to Face									NA
DEIDENTIFIED	DEIDENTIFIED	Exam-2	69	0.777697028	0.958997077	1.269918279	Face to Face	1	2	2	16	15	10	6	7	71-100%	5	5	Electronically	19	1	2	2	2	2
DEIDENTIFIED	DEIDENTIFIED	Exam-2	83	NA	NA	NA	Face to Face									NA
DEIDENTIFIED	DEIDENTIFIED	Exam-2	85.5	0.384995294	-2.392343814	0.069695426	Face to Face	2	2	2	16	0	7	3	5	71-100%	5	3	I did not ask questions at all	20	1	2	2	2	2
DEIDENTIFIED	DEIDENTIFIED	Exam-2	51	-0.378484451	1.717988444	0.762976079	Face to Face	4	4	4	17	10	18	7	3	10-30%	2	5	I did not ask questions at all	19	1	1	1	2	2
DEIDENTIFIED	DEIDENTIFIED	Exam-2	104.5	0.203569888	-0.583423757	0.079813115	Face to Face	2	2	2	15		15	3	6	31-50%	3	3	Electronically	20	1	2	2	2	2
DEIDENTIFIED	DEIDENTIFIED	Exam-2	43	NA	NA	NA	Face to Face									NA
DEIDENTIFIED	DEIDENTIFIED	Exam-2	84.5	0.116818112	0.934558977	-0.207954729	Face to Face	4	5	1	18		3	3	5	10-30%	2	4	I did not ask questions at all	19	1	1	1	2	2
DEIDENTIFIED	DEIDENTIFIED	Exam-2	34	0.541093098	-0.980201122	0.080786128	Face to Face	2	3	2	13	15	5	5	4	51-70%	4	2	Electronically	19	1	1	1	2	2
DEIDENTIFIED	DEIDENTIFIED	Exam-2	63	0.330997705	-0.477583714	-1.306142101	Face to Face	2	2	2	13		8	7	7	51-70%	4	3	I did not ask questions at all	19	1	1	1	2	2
DEIDENTIFIED	DEIDENTIFIED	Exam-2	95	NA	NA	NA	Face to Face									NA
DEIDENTIFIED	DEIDENTIFIED	Exam-2	81.5	-0.341326842	-0.186646393	0.091431557	Face to Face	2	4	4	15	0	30	6	5	31-50%	3	3	I did not ask questions at all	19	1	1	1	2	2
DEIDENTIFIED	DEIDENTIFIED	Exam-2	86.5	-0.539475991	1.408555957	1.31949554	Face to Face	4	5	3	16	25	10	7	3	51-70%	4	2	I did not ask questions at all	21	1	1	1	2	2
DEIDENTIFIED	DEIDENTIFIED	Exam-2	88.5	-0.480182897	-0.020588779	-0.015589628	Face to Face	4	4	1	15		15	5	5	31-50%	3	5	Electronically	19	1	1	1	1	1
DEIDENTIFIED	DEIDENTIFIED	Exam-2	70	-0.292559603	0.692497855	-0.166862717	Face to Face	2	3	3	12	15	40	5	5	51-70%	4	4	Small Groups	19	1	1	1	2	2
DEIDENTIFIED	DEIDENTIFIED	Exam-2	65	-0.716007661	-0.95873449	-0.994519178	Face to Face	3	4	2	16	9	2	5	4	31-50%	3	5	I did not ask questions at all	22	1	2	2	1	1
DEIDENTIFIED	DEIDENTIFIED	Exam-2	77.5	0.653008477	-1.0431079	-1.725140455	Face to Face	1	2	1	17		0	5	6	31-50%	3	2	I did not ask questions at all	19	1	1	1	2	2
DEIDENTIFIED	DEIDENTIFIED	Exam-2	104.5	0.176629212	-0.150866922	0.638011774	Face to Face	3	2	2	14		5	3	4	51-70%	4	1	Electronically	20	1	1	1	2	2
DEIDENTIFIED	DEIDENTIFIED	Exam-2	53	0.186328139	1.321211079	-0.808180725	Face to Face	3	2	1	14	8	3	5	3	31-50%	3	2	I did not ask questions at all		1	1	1	1	1
DEIDENTIFIED	DEIDENTIFIED	Exam-2	58	-0.294806921	-0.2382118	0.636599013	Face to Face	3	4	1	15	12		3	6	31-50%	3	3	Electronically	20	1	2	2	2	2
DEIDENTIFIED	DEIDENTIFIED	Exam-2	97.5	-1.156008482	1.253839714	0.232559686	Face to Face	4	5	4	12	0	3	7	1	<10%	1	5	I did not ask questions at all	20	1	2	2	2	2
DEIDENTIFIED	DEIDENTIFIED	Exam-2	70	NA	NA	NA	Face to Face									NA
DEIDENTIFIED	DEIDENTIFIED	Exam-2	104	-0.036205447	-1.913882246	0.85426051	Face to Face	1	2	2	13	30	0	7	7	51-70%	4	3	I did not ask questions at all	19	1	2	2	2	2
DEIDENTIFIED	DEIDENTIFIED	Exam-2	79.5	-1.325610862	-1.974099816	-2.167240554	Face to Face	3	4	1	16	10	5	7	4	<10%	1	3	I did not ask questions at all	21	1	1	1	1	1
DEIDENTIFIED	DEIDENTIFIED	Exam-2	82	NA	NA	NA	NA									NA
DEIDENTIFIED	DEIDENTIFIED	Exam-2	24	NA	NA	NA	NA									NA
DEIDENTIFIED	DEIDENTIFIED	Exam-2	42	NA	NA	NA	NA									NA
DEIDENTIFIED	DEIDENTIFIED	Exam-2	84.5	NA	NA	NA	NA									NA
DEIDENTIFIED	DEIDENTIFIED	Exam-2		NA	NA	NA	NA									NA
DEIDENTIFIED	DEIDENTIFIED	Exam-2	50.5	NA	NA	NA	NA									NA
DEIDENTIFIED	DEIDENTIFIED	Exam-2	81.5	NA	NA	NA	NA									NA
DEIDENTIFIED	DEIDENTIFIED	Exam-2	27	NA	NA	NA	NA									NA
DEIDENTIFIED	DEIDENTIFIED	Exam-2	85.5	NA	NA	NA	NA									NA
DEIDENTIFIED	DEIDENTIFIED	Exam-2	40	NA	NA	NA	NA									NA
DEIDENTIFIED	DEIDENTIFIED	Exam-2	69	NA	NA	NA	NA									NA
DEIDENTIFIED	DEIDENTIFIED	Exam-2	41	NA	NA	NA	NA									NA
DEIDENTIFIED	DEIDENTIFIED	Exam-2	0	NA	NA	NA	NA									NA
DEIDENTIFIED	DEIDENTIFIED	Exam-2	59.5	NA	NA	NA	NA									NA
DEIDENTIFIED	DEIDENTIFIED	Exam-2	0	NA	NA	NA	NA									NA
DEIDENTIFIED	DEIDENTIFIED	Exam-2	59.5	NA	NA	NA	NA									NA
DEIDENTIFIED	DEIDENTIFIED	Exam-2	75	NA	NA	NA	NA									NA
DEIDENTIFIED	DEIDENTIFIED	Exam-2	43.5	NA	NA	NA	NA									NA
DEIDENTIFIED	DEIDENTIFIED	Exam-2	56.5	NA	NA	NA	NA									NA
DEIDENTIFIED	DEIDENTIFIED	Exam-2	68	NA	NA	NA	NA									NA
DEIDENTIFIED	DEIDENTIFIED	Exam-2	50	NA	NA	NA	NA									NA
DEIDENTIFIED	DEIDENTIFIED	Exam-2	84.5	NA	NA	NA	NA									NA
DEIDENTIFIED	DEIDENTIFIED	Exam-2	36	NA	NA	NA	NA									NA
DEIDENTIFIED	DEIDENTIFIED	Exam-2	107.5	NA	NA	NA	NA									NA
DEIDENTIFIED	DEIDENTIFIED	Exam-2	84	NA	NA	NA	NA									NA
DEIDENTIFIED	DEIDENTIFIED	Exam-2	88.5	NA	NA	NA	NA									NA
DEIDENTIFIED	DEIDENTIFIED	Exam-2	95.5	NA	NA	NA	NA									NA
DEIDENTIFIED	DEIDENTIFIED	Exam-2	13	NA	NA	NA	NA									NA
DEIDENTIFIED	DEIDENTIFIED	Exam-2	55	NA	NA	NA	NA									NA
DEIDENTIFIED	DEIDENTIFIED	Exam-2	46.5	NA	NA	NA	NA									NA
DEIDENTIFIED	DEIDENTIFIED	Exam-2	65	NA	NA	NA	NA									NA
DEIDENTIFIED	DEIDENTIFIED	Exam-2	96	NA	NA	NA	NA									NA
DEIDENTIFIED	DEIDENTIFIED	Exam-2	22	NA	NA	NA	NA									NA
DEIDENTIFIED	DEIDENTIFIED	Exam-2	0	NA	NA	NA	NA									NA
DEIDENTIFIED	DEIDENTIFIED	Exam-2	53	NA	NA	NA	NA									NA
DEIDENTIFIED	DEIDENTIFIED	Exam-2	94	NA	NA	NA	NA									NA
DEIDENTIFIED	DEIDENTIFIED	Exam-2	50.5	NA	NA	NA	NA									NA
DEIDENTIFIED	DEIDENTIFIED	Exam-2	71	NA	NA	NA	Online									NA
DEIDENTIFIED	DEIDENTIFIED	Exam-2	57	NA	NA	NA	Online									NA
DEIDENTIFIED	DEIDENTIFIED	Exam-2	61.5	NA	NA	NA	Online									NA
DEIDENTIFIED	DEIDENTIFIED	Exam-2	81	0.161116774	-2.852027956	1.222680035	Online	2	4	1	16		15	3	7	31-50%	3	3	Electronically	20	1	1	1	2	2
DEIDENTIFIED	DEIDENTIFIED	Exam-2	100.5	0.607315483	-1.805070735	0.715737835	Online	2	4	1	16		8	5	6	51-70%	4	5	Electronically	19	1	2	2	2	2
DEIDENTIFIED	DEIDENTIFIED	Exam-2	50.5	0.197372	0.154100977	1.461210272	Online	2	2	2	15		5	6	5	71-100%	5	2	I did not ask questions at all	19	1	2	2	2	2
DEIDENTIFIED	DEIDENTIFIED	Exam-2	77	NA	NA	NA	Online									NA
DEIDENTIFIED	DEIDENTIFIED	Exam-2	64.5	0.113578232	-0.779580146	-1.273109551	Online	2	2	1	3	40	10	2	7	31-50%	3	5	I did not ask questions at all	24	1	1	1	1	1
DEIDENTIFIED	DEIDENTIFIED	Exam-2	67.5	-0.250106488	1.609176933	-0.410877269	Online	4	4	2	17		3	2	4	51-70%	4	1	Electronically	20	1	1	1	1	1
DEIDENTIFIED	DEIDENTIFIED	Exam-2	100	-0.009264771	-1.717725857	-0.110992371	Online	2	2	1	14		15	3	6	51-70%	4	3	I did not ask questions at all	19	1	1	1	2	2
DEIDENTIFIED	DEIDENTIFIED	Exam-2	54.5	-1.463474355	1.5632722	0.770535072	Online	3	4	2	14	20		7	2	71-100%	5	5	I did not ask questions at all	21	1	1	1	2	2
DEIDENTIFIED	DEIDENTIFIED	Exam-2	55	NA	NA	NA	Online									NA
DEIDENTIFIED	DEIDENTIFIED	Exam-2	100.5	0.543601575	-2.114503222	1.030314933	Online	2	3	2	15		5	2	5	71-100%	5	2	I did not ask questions at all	19	1	2	2	2	2
DEIDENTIFIED	DEIDENTIFIED	Exam-2	71.5	0.342425943	1.717988444	-1.803792771	Online	2	3	1	12			7	3	51-70%	4	1		20	1	1	1	2	2
DEIDENTIFIED	DEIDENTIFIED	Exam-2	69.5	0.656296119	0.608124445	-0.678309639	Online	1	3	4	17		24	6	4	<10%	1	3	I did not ask questions at all	20	1	1	1	2	2
DEIDENTIFIED	DEIDENTIFIED	Exam-2	75.5	NA	NA	NA	Online									NA
DEIDENTIFIED	DEIDENTIFIED	Exam-2	67.5	0.836163194	-3.635457424	1.461210272	Online	1	1	1	15	20	15	7	7	10-30%	2	5	I did not ask questions at all	19	1	2	2	2	2
DEIDENTIFIED	DEIDENTIFIED	Exam-2	28.5	0.003173422	0.671031223	-0.170347668	Online	2	2	1	11			1	4	31-50%	3	3	I did not ask questions at all	21	1	2	2	2	2
DEIDENTIFIED	DEIDENTIFIED	Exam-2	62.5	NA	NA	NA	Online									NA
DEIDENTIFIED	DEIDENTIFIED	Exam-2	15	NA	NA	NA	Online									NA
DEIDENTIFIED	DEIDENTIFIED	Exam-2	72.5	0.506396203	1.45446069	1.461210272	Online	2	3	2	13	0	7	3	6	<10%	1	2	I did not ask questions at all	19	1	1	1	2	2
DEIDENTIFIED	DEIDENTIFIED	Exam-2	98	NA	NA	NA	Online									NA
DEIDENTIFIED	DEIDENTIFIED	Exam-2	45.5	NA	NA	NA	Online									NA
DEIDENTIFIED	DEIDENTIFIED	Exam-2	21.5	NA	NA	NA	Online									NA
DEIDENTIFIED	DEIDENTIFIED	Exam-2	59	-0.438508948	-0.392928044	-0.562110982	Online	4	4	4	15	0	2	1	1	31-50%	3	5	I did not ask questions at all	19	1	1	1	2	2
DEIDENTIFIED	DEIDENTIFIED	Exam-2	110	-0.909919022	1.5632722	0.346831804	Online	1	4	1	15		10	5	5	71-100%	5	5	I did not ask questions at all	19	1	2	2	1	1
DEIDENTIFIED	DEIDENTIFIED	Exam-2	49	0.039599628	-1.192163469	1.032361056	Online	1	1	1	15			1	1	<10%	1	1	Small Groups	20	1	1	1	1	1
DEIDENTIFIED	DEIDENTIFIED	Exam-2	49.5	-0.199396542	0.417628731	-0.477412531	Online	4	5	1	15	0	10	5	6	71-100%	5	4	I did not ask questions at all	20	1	2	2	2	2
DEIDENTIFIED	DEIDENTIFIED	Exam-2	68	-0.404474981	-1.296510392	-0.954353421	Online	2	2	2	14		20	4	5	10-30%	2	3	I did not ask questions at all	19	1	1	1	2	2
DEIDENTIFIED	DEIDENTIFIED	Exam-2	61	-0.883149327	1.717988444	-0.617008316	Online	4	3	4	17		5	7	3	10-30%	2	2	I did not ask questions at all	19	1	2	2	2	2
DEIDENTIFIED	DEIDENTIFIED	Exam-2	66	NA	NA	NA	Online									NA
DEIDENTIFIED	DEIDENTIFIED	Exam-2	58.5	-0.005361963	1.717988444	0.243750485	Online	4	4	2	18	15	23	5	5	31-50%	3	4	I did not ask questions at all	19	1	2	2	1	1
DEIDENTIFIED	DEIDENTIFIED	Exam-2	88	0.660764696	1.609176933	0.991828375	Online	1	1	2	3	0	6	5	4	71-100%	5	4	I did not ask questions at all	19	1	1	1	2	2
DEIDENTIFIED	DEIDENTIFIED	Exam-2	90.5	0.40245044	1.717988444	1.125277928	Online	2	4	1	15	0	8	5	4	71-100%	5	2	Electronically and Small Groups	20	1	1	1	1	1
DEIDENTIFIED	DEIDENTIFIED	Exam-2	48.5	-0.217417456	1.717988444	1.365807529	Online	2	4	2	14	20	25	7	3	71-100%	5	2	Small Groups	20	1	1	1	2	2
DEIDENTIFIED	DEIDENTIFIED	Exam-2	79.5	0.769940809	1.717988444	1.04155249	Online	2	2	1	17		9	5	5	31-50%	3	3	I did not ask questions at all	19	1	2	2	2	2
DEIDENTIFIED	DEIDENTIFIED	Exam-2	59	0.145882888	-0.196771655	0.244236991	Online	2	2	1	16		5	5	5	51-70%	4	3	Small Groups	19	1	1	1	1	1
DEIDENTIFIED	DEIDENTIFIED	Exam-2	92.5	NA	NA	NA	Online									NA
DEIDENTIFIED	DEIDENTIFIED	Exam-2	58	-0.735021138	-1.538571513	-2.694025141	Online	2	3	2	14		10	4	4	<10%	1	4	I did not ask questions at all	20	1	2	2	2	2
DEIDENTIFIED	DEIDENTIFIED	Exam-2	65	-1.698118184	1.717988444	-2.549971393	Online	4	4	2	15		0	1	1	10-30%	2	5	I did not ask questions at all	20	1	1	1	1	1
DEIDENTIFIED	DEIDENTIFIED	Exam-2	54	0.440173818	0.608124445	0.349317675	Online	2	2	2	14	0		7	5	51-70%	4	4	Small Groups	19	1	2	2	2	2
DEIDENTIFIED	DEIDENTIFIED	Exam-2	51	-0.087481163	-1.451226635	0.677571443	Online	2	2	1	18	12	6	5	5	51-70%	4	1	I did not ask questions at all	20	1	2	2	2	2
DEIDENTIFIED	DEIDENTIFIED	Exam-2	64.5	0.653008477	1.408555957	1.029875185	Online	2	2	1	18		7	2	5	51-70%	4	4	I did not ask questions at all	19	1	1	1	2	2
DEIDENTIFIED	DEIDENTIFIED	Exam-2	41.5	NA	NA	NA	Online									NA
DEIDENTIFIED	DEIDENTIFIED	Exam-2	65	0.148391364	1.45446069	-1.610601511	Online	2	2	2	13		0	4	6	51-70%	4	5	Electronically	20	1	2	2	2	2
DEIDENTIFIED	DEIDENTIFIED	Exam-2	81.5	0.836163194	1.717988444	1.461210272	Online	2	3	1	14	15	15	7	5	10-30%	2	4	Electronically		1	1	1	2	2
DEIDENTIFIED	DEIDENTIFIED	Exam-2	73	NA	NA	NA	Online									NA
DEIDENTIFIED	DEIDENTIFIED	Exam-2	18	NA	NA	NA	Online									NA
DEIDENTIFIED	DEIDENTIFIED	Exam-2	80	NA	NA	NA	Online									NA
DEIDENTIFIED	DEIDENTIFIED	Exam-2	73.5	0.424160766	1.500365423	-0.17378835	Online	4	4	1	15		12	7	2	51-70%	4	2	I did not ask questions at all	19	1	1	1	1	1
DEIDENTIFIED	DEIDENTIFIED	Exam-2	95.5	-0.011773247	0.045289466	1.223166542	Online	2	4	2	16	0	3	7	5	51-70%	4	5	Electronically	20	1	1	1	2	2
DEIDENTIFIED	DEIDENTIFIED	Exam-2	74	0.836163194	0.695469323	1.461210272	Online	2	2	1	15		5	1	6	51-70%	4	2	I did not ask questions at all	20	1	1	1	2	2
DEIDENTIFIED	DEIDENTIFIED	Exam-2	33.5	0.586786092	1.717988444	0.411187399	Online	2	3	1	15	12	0	5	4	<10%	1	5	I did not ask questions at all	19	1	2	2	2	2
DEIDENTIFIED	DEIDENTIFIED	Exam-2	81.5	NA	NA	NA	Online									NA
DEIDENTIFIED	DEIDENTIFIED	Exam-2	39.5	-0.351543775	1.067808588	0.406174996	Online	2	3	1	12	0	0	3	4	31-50%	3	3	I did not ask questions at all	21	1	2	2	1	1
DEIDENTIFIED	DEIDENTIFIED	Exam-2	65	-0.737316218	-0.443297364	0.111374042	Online	4	4	1	16	15	8	6	1	<10%	1	3	I did not ask questions at all	19	1	2	2	2	2
DEIDENTIFIED	DEIDENTIFIED	Exam-2	81.5	NA	NA	NA	Online									NA
DEIDENTIFIED	DEIDENTIFIED	Exam-2	71	-1.507986413	-2.124351472	-2.134900227	Online	2	2	2	14	10		2	2	10-30%	2	2	I did not ask questions at all	20	2	1	1	1	1
DEIDENTIFIED	DEIDENTIFIED	Exam-2	53.5	NA	NA	NA	Online									NA
DEIDENTIFIED	DEIDENTIFIED	Exam-2	78.5	0.325749963	1.5632722	-0.265310663	Online	2	2	2	15	20	0	5	4	51-70%	4	2	I did not ask questions at all	20	1	2	2	2	2
DEIDENTIFIED	DEIDENTIFIED	Exam-2	53.5	NA	NA	1.461210272	Online	2	2	2	14	0	12	4	4	51-70%	4	5	Electronically	19	1	1	1	2	2
DEIDENTIFIED	DEIDENTIFIED	Exam-2	53	-0.27063588	1.717988444	-0.415290963	Online	2	2	1	16	20	2	7	4	51-70%	4	5	Electronically and Small Groups	22	1	1	1	1	1
DEIDENTIFIED	DEIDENTIFIED	Exam-2	82.5	0.130370449	0.460561996	0.435042477	Online	4	4	1	12	0	4	6	6	51-70%	4	4	I did not ask questions at all	20	1	1	1	2	2
DEIDENTIFIED	DEIDENTIFIED	Exam-2	38	NA	NA	NA	Online									NA
DEIDENTIFIED	DEIDENTIFIED	Exam-2	72.5	0.721739339	0.045289466	1.128690054	Online	1	2	1	17		11	4	5	31-50%	3	2	Electronically	18	1	1	1	1	1
DEIDENTIFIED	DEIDENTIFIED	Exam-2	55.5	0.551357794	-0.61798712	1.222680035	Online	1	2	2	14		10	5	4	31-50%	3	1	I did not ask questions at all		1	1	1	1	1
DEIDENTIFIED	DEIDENTIFIED	Exam-2	54.5	-0.183884103	0.439095364	-2.09506016	Online	2	2	1	14		0	2	5	31-50%	3	2	I did not ask questions at all	19	1	1	1	2	2
DEIDENTIFIED	DEIDENTIFIED	Exam-2	81.5	0.120671523	0.499312934	0.770535072	Online	2	2	1	16		5	3	5	71-100%	5	3	I did not ask questions at all	20	1	2	2	2	2
DEIDENTIFIED	DEIDENTIFIED	Exam-2	39.5	NA	NA	NA	Online									NA
DEIDENTIFIED	DEIDENTIFIED	Exam-2	65.5	-0.452013523	0.042317999	-2.299377442	Online	5	5	2	15	0	10	1	6	51-70%	4	3	I did not ask questions at all	20	1	2	2	2	2
DEIDENTIFIED	DEIDENTIFIED	Exam-2	69	0.332940413	-0.196771655	0.790271839	Online	2	2	1	14	0	10	3	5	51-70%	4	4	I did not ask questions at all	20	1	1	1	2	2
DEIDENTIFIED	DEIDENTIFIED	Exam-2	94	0.836163194	-0.087960145	0.711619523	Online	4	4	3	18			4	5	31-50%	3	4	Electronically	22	1	1	1	2	2
DEIDENTIFIED	DEIDENTIFIED	Exam-2	109	NA	NA	NA	Online									NA
DEIDENTIFIED	DEIDENTIFIED	Exam-2	73	0.213834584	-0.874361079	0.127537866	Online	4	4	4	14	6		7	6	51-70%	4	1	I did not ask questions at all	19	1	1	1	1	1
DEIDENTIFIED	DEIDENTIFIED	Exam-2	56	0.562353892	1.408555957	1.461210272	Online	1	2	4	17	0	2	3	6	51-70%	4	5	I did not ask questions at all	19	1	1	1	2	2
DEIDENTIFIED	DEIDENTIFIED	Exam-2	73	NA	NA	NA	Online									NA
DEIDENTIFIED	DEIDENTIFIED	Exam-2	43	-0.025064426	0.221472342	-0.194644983	Online	2	4	1	12	15	5	7	5	31-50%	3	4	I did not ask questions at all	20	1	1	1	1	1
DEIDENTIFIED	DEIDENTIFIED	Exam-2	79.5	-0.257862707	-0.066493512	-0.477412531	Online	2	2	1	17	0	0	2	4	31-50%	3	5	Electronically	19	1	1	1	2	2
DEIDENTIFIED	DEIDENTIFIED	Exam-2	38	-0.348517292	1.717988444	-1.592878071	Online	4	3	2	18	1	10	7	3	10-30%	2	3	Small Groups	21	1	2	2	2	2
DEIDENTIFIED	DEIDENTIFIED	Exam-2	46.5	-0.374795039	-0.087960145	-1.042683677	Online	1	2	2	16		10	5	4	31-50%	3	3	Electronically	24	1	1	1	1	1
DEIDENTIFIED	DEIDENTIFIED	Exam-2	89	NA	NA	NA	Online									NA
DEIDENTIFIED	DEIDENTIFIED	Exam-2	58	NA	NA	NA	Online									NA
DEIDENTIFIED	DEIDENTIFIED	Exam-2	51	-0.954602061	-0.087960145	-2.336676832	Online	4	2	1	14	15	3	4	5	<10%	1	3	I did not ask questions at all	20	1	1	1	2	2
DEIDENTIFIED	DEIDENTIFIED	Exam-2	85.5	0.597050788	1.04068128	-0.677336626	Online	3	5	2	15		3	2	4	10-30%	2	3	I did not ask questions at all	18	1	1	1	1	1
DEIDENTIFIED	DEIDENTIFIED	Exam-2	97	NA	NA	NA	Online									NA
DEIDENTIFIED	DEIDENTIFIED	Exam-2	60.5	0.145882888	1.500365423	0.024089623	Online	2	3	1	15		3	3	5	31-50%	3	2	I did not ask questions at all	19	1	2	2	2	2
DEIDENTIFIED	DEIDENTIFIED	Exam-2	73.5	NA	NA	NA	Online									NA
DEIDENTIFIED	DEIDENTIFIED	Exam-2	79	-0.077995632	0.695469323	0.887234198	Online	2	2	4	13	10	5	7	4	31-50%	3	1	Electronically	18	1	2	2	1	1
DEIDENTIFIED	DEIDENTIFIED	Exam-2	65	-0.915838359	-1.968156881	-0.713337314	Online	4	2	1	16		5	6	4	31-50%	3	2	Electronically	19	1	2	2	2	2
DEIDENTIFIED	DEIDENTIFIED	Exam-2	79.5	-0.989816963	0.130878984	-1.1507507	Online	3	3	5	14		11	7	3	<10%	1	3	I did not ask questions at all	19	1	2	2	2	2
DEIDENTIFIED	DEIDENTIFIED	Exam-2	53	0.526359825	0.245910443	1.049551232	Online	2	3	4	14	34	27	5	3	10-30%	2	5	I did not ask questions at all	21	1	1	1	2	2
DEIDENTIFIED	DEIDENTIFIED	Exam-2	66	0.099410729	-1.166232248	-0.948913375	Online	3	3	3	14		10	3	3	31-50%	3	3	Electronically	20	1	1	1	1	1
DEIDENTIFIED	DEIDENTIFIED	Exam-2	59.5	-0.208882072	-0.066493512	-0.275355527	Online	1	2	1	14	10	4	4	4	51-70%	4	4	I did not ask questions at all	19	1	2	2	1	1
DEIDENTIFIED	DEIDENTIFIED	Exam-2	70.5	0.836163194	-0.51902386	1.461210272	Online	4	4	1	15		32	7	4	<10%	1	2	I did not ask questions at all	19	1	1	1	2	2
DEIDENTIFIED	DEIDENTIFIED	Exam-2	92.5	NA	NA	NA	Online									NA
DEIDENTIFIED	DEIDENTIFIED	Exam-2	84	-0.324085093	1.717988444	-1.398352788	Online	1	4	4	16	10	20	4	3	<10%	1	3	I did not ask questions at all	19	1	1	1	2	2
DEIDENTIFIED	DEIDENTIFIED	Exam-2	85.5	0.665781649	1.717988444	0.463530929	Online	1	2	1	13		2	7	6	10-30%	2	3	I did not ask questions at all	20	1	1	1	2	2
DEIDENTIFIED	DEIDENTIFIED	Exam-2	49.5	-0.942346895	1.717988444	-1.004636867	Online	2	5	3	12	18	15	5	3	<10%	1	3	I did not ask questions at all	20	1	2	2	2	2
DEIDENTIFIED	DEIDENTIFIED	Exam-2	81	0.370711554	-1.666160449	-2.376356083	Online	2	4	1	14	40	10	7	5	31-50%	3	2	I did not ask questions at all	19	1	1	1	2	2
DEIDENTIFIED	DEIDENTIFIED	Exam-2	81	0.186328139	-1.826537368	0.580169335	Online	1	1	1	14	0	14	2	7	71-100%	5	2	Electronically	20	1	2	2	2	2
DEIDENTIFIED	DEIDENTIFIED	Exam-2	39.5	NA	NA	NA	Online									NA
DEIDENTIFIED	DEIDENTIFIED	Exam-2	58.5	NA	NA	NA	Online									NA
DEIDENTIFIED	DEIDENTIFIED	Exam-2	40.5	NA	NA	NA	Online									NA
DEIDENTIFIED	DEIDENTIFIED	Exam-2	112	0.780205505	-0.175305023	0.232559686	Online	2	2	2	14	12	1	6	6	31-50%	3	3	Electronically	20	1	1	1	2	2
DEIDENTIFIED	DEIDENTIFIED	Exam-2	67	-0.053186038	-2.852027956	0.780652761	Online	2	4	1	16		15	7	7	71-100%	5	2	I did not ask questions at all	19	1	2	2	2	2
DEIDENTIFIED	DEIDENTIFIED	Exam-2	39	-0.067068008	1.067808588	-2.214478798	Online	3	3	2	16	0	14	3	3	10-30%	2	4	In person	19	1	1	1	2	2
DEIDENTIFIED	DEIDENTIFIED	Exam-2	46.5	-0.527203432	-1.113450733	-0.752530058	Online	2	2	2	12	31	20	7	7	71-100%	5	3	I did not ask questions at all	21	1	2	2	1	1
DEIDENTIFIED	DEIDENTIFIED	Exam-2	49	NA	NA	NA	Online									NA
DEIDENTIFIED	DEIDENTIFIED	Exam-2	46.5	-0.497638042	1.5632722	0.237164504	Online	2	4	1	18	14	4	5	3	51-70%	4	4	Electronically	20	1	1	1	2	2
DEIDENTIFIED	DEIDENTIFIED	Exam-2	95	0.31297679	1.500365423	0.627407579	Online	2	4	5	13		15	5	2	<10%	1	2	Electronically and Small Groups	20	1	2	2	2	2
DEIDENTIFIED	DEIDENTIFIED	Exam-2	44	0.350182162	1.717988444	-0.420496347	Online	1	4	2	14	0	13	3	3	10-30%	2	2	I did not ask questions at all	21	1	1	1	1	1
DEIDENTIFIED	DEIDENTIFIED	Exam-2	97	0.237603855	0.431941569	-2.011935287	Online	2	2	1	16	0	20	7	4	31-50%	3	2	I did not ask questions at all	19	1	2	2	2	2
DEIDENTIFIED	DEIDENTIFIED	Exam-2	83.5	NA	NA	NA	Online									NA
DEIDENTIFIED	DEIDENTIFIED	Exam-2	102.5	0.283296848	-2.533963327	1.125277928	Online	2	3	1	15	10	10	6	7	NA		5	I did not ask questions at all	19	1	1	1	2	2
DEIDENTIFIED	DEIDENTIFIED	Exam-2	43	NA	NA	NA	Online									NA
DEIDENTIFIED	DEIDENTIFIED	Exam-2	72	-0.605650613	-1.742163957	-0.939235435	Online	4	4	2	12	10	3	5	4	31-50%	3	2	I did not ask questions at all	20	1	1	1	1	1
DEIDENTIFIED	DEIDENTIFIED	Exam-2	81	-0.165478812	-2.259094203	-0.141480187	Online	3	4	2	14					10-30%	2	5	Electronically	19	1	1	1	2	2
DEIDENTIFIED	DEIDENTIFIED	Exam-2	55.5	-0.180383065	1.717988444	-0.928484385	Online	2	4	2	13		6	7	2	<10%	1	3	I did not ask questions at all	19	1	1	1	1	1
DEIDENTIFIED	DEIDENTIFIED	Exam-2	38.5	0.127861973	1.717988444	0.674645823	Online	2	4	2	18		3	6	4	51-70%	4	4	I did not ask questions at all	19	1	1	1	2	2
DEIDENTIFIED	DEIDENTIFIED	Exam-2	36.5	NA	NA	NA	Online									NA
DEIDENTIFIED	DEIDENTIFIED	Exam-2	30.5	NA	NA	NA	Online									NA
DEIDENTIFIED	DEIDENTIFIED	Exam-2	94.5	-0.052218498	-1.067546	-0.053149931	Online	4	3	2	13	15	6	6	4	51-70%	4	3	I did not ask questions at all	19	1	2	2	2	2
DEIDENTIFIED	DEIDENTIFIED	Exam-2	74	-0.67104607	-1.584476246	-0.454970214	Online	4	4	3	12		7	5	3	51-70%	4	5	I did not ask questions at all	19	1	1	1	2	2
DEIDENTIFIED	DEIDENTIFIED	Exam-2	74	-0.219360164	1.717988444	-0.170286949	Online	3	3	2	16		2	6	3	NA		3	I did not ask questions at all	19	1	1	1	1	1
DEIDENTIFIED	DEIDENTIFIED	Exam-2	63.5	0.168872993	0.428970101	-1.962697679	Online	2	4	4	17	0	8	5	6	NA		2	I did not ask questions at all	19	1	1	1	1	1
DEIDENTIFIED	DEIDENTIFIED	Exam-2	59.5	-0.167871052	1.5632722	0.647144346	Online	2	4	1	18	10	2	7	2	51-70%	4	2	I did not ask questions at all		1	1	1	2	2
DEIDENTIFIED	DEIDENTIFIED	Exam-2	49.5	-0.077995632	1.717988444	-0.072459054	Online	4	5	2	16		5	5	3	10-30%	2	1		20	1	1	1	2	2
DEIDENTIFIED	DEIDENTIFIED	Exam-2	51	-0.080504109	1.717988444	-1.388335195	Online	2	2	1	14		4	5	4	51-70%	4	2	Electronically and In person		1	2	2	1	1
DEIDENTIFIED	DEIDENTIFIED	Exam-2	89.5	-0.144218017	1.500365423	1.175928298	Online	2	2	1	12		10	3	4	51-70%	4	1	Electronically	19	1	1	1	2	2
DEIDENTIFIED	DEIDENTIFIED	Exam-2	99	-0.10862572	-0.407240881	1.461210272	Online	4	4	1	18	10		7	5	10-30%	2	3	Electronically	19	2	1	1	2	2
DEIDENTIFIED	DEIDENTIFIED	Exam-2	19	-1.255321669	1.717988444	-0.606743772	Online	4	4	1	14	20	20	7	7	10-30%	2	5	I did not ask questions at all	19	1	2	2	2	2
DEIDENTIFIED	DEIDENTIFIED	Exam-2	34	-0.142659687	1.717988444	-0.188231925	Online	2	3	3	15		2	7	3	51-70%	4	5	I did not ask questions at all	20	1	2	2	2	2
DEIDENTIFIED	DEIDENTIFIED	Exam-2	23	-0.322124992	1.222524831	-1.41411624	Online	2	3	2	12			4	5	<10%	1	1	I did not ask questions at all	22	1	1	1	1	1
DEIDENTIFIED	DEIDENTIFIED	Exam-2	42	NA	NA	NA	Online									NA
DEIDENTIFIED	DEIDENTIFIED	Exam-2	104	-0.387019836	-1.584476246	-1.09036167	Online	2	1	1	13	10		4	7	31-50%	3	2	I did not ask questions at all	19	1	2	2	2	2
DEIDENTIFIED	DEIDENTIFIED	Exam-2	63	0.014217283	1.717988444	0.655896031	Online	1	2	2	14	0	24	7	7	51-70%	4	4	Small Groups		1	2	2	1	1
DEIDENTIFIED	DEIDENTIFIED	Exam-2	98	0.307729048	-3.635457424	-0.195630101	Online	1	2	2	14	15	0	7	6	51-70%	4	2	Small Groups	19	1	1	1	1	1
DEIDENTIFIED	DEIDENTIFIED	Exam-2	69.5	-0.404474981	1.212399568	-0.351035465	Online	2	2	2	16	12	20	6	4	51-70%	4	2		20	1	1	2	2	2
DEIDENTIFIED	DEIDENTIFIED	Exam-2	49	NA	NA	NA	Online									NA
DEIDENTIFIED	DEIDENTIFIED	Exam-2	81	0.213834584	0.741374056	-0.368612051	Online	5	5	5	14		30	5	5	<10%	1	2	I did not ask questions at all	20	1	1	1	2	2
DEIDENTIFIED	DEIDENTIFIED	Exam-2	53	0.307729048	1.717988444	0.981663928	Online	3	4	3	16			7	5	51-70%	4	2	Small Groups	22	2	2	2	2	2
DEIDENTIFIED	DEIDENTIFIED	Exam-2	33	NA	NA	NA	Online									NA
DEIDENTIFIED	DEIDENTIFIED	Exam-3	62	NA	NA	NA	Face to Face									NA
DEIDENTIFIED	DEIDENTIFIED	Exam-3	40	-0.474935154	1.717988444	-0.984354731	Face to Face	2	4	2	13	15	6	7	2	10-30%	2	3	I did not ask questions at all	20	1	1	1	2	2
DEIDENTIFIED	DEIDENTIFIED	Exam-3	102	0.551357794	-1.968156881	1.271331041	Face to Face	2	2	1	12			2	7	71-100%	5	5	Electronically	20	1	2	2	2	2
DEIDENTIFIED	DEIDENTIFIED	Exam-3	63	NA	NA	NA	Face to Face									NA
DEIDENTIFIED	DEIDENTIFIED	Exam-3	38	0.721739339	0.572344975	1.318569285	Face to Face	1	2	2	18		20	5	5	31-50%	3	3	Electronically, In person, and Small Groups	19	1	2	2	2	2
DEIDENTIFIED	DEIDENTIFIED	Exam-3	42.5	0.395875156	1.717988444	0.762976079	Face to Face	4	4	1	13		8	7	2	10-30%	2	5	I did not ask questions at all	19	1	2	1	1	2
DEIDENTIFIED	DEIDENTIFIED	Exam-3	45.5	-0.219360164	1.057683325	0.165098169	Face to Face	2	2	2	14		3	5	4	51-70%	4	3	Electronically	19	1	1	1	2	2
DEIDENTIFIED	DEIDENTIFIED	Exam-3	42	0.492891628	1.500365423	0.13927589	Face to Face	2	2	1	13	3	2	5	4	10-30%	2	3	I did not ask questions at all	19	1	1	1	2	2
DEIDENTIFIED	DEIDENTIFIED	Exam-3	67.5	0.589294568	-2.488058594	0.483693482	Face to Face	1	2	1	16	13	5	7	5	51-70%	4	1	I did not ask questions at all	20	1	2	2	2	2
DEIDENTIFIED	DEIDENTIFIED	Exam-3	23	-0.657541495	1.717988444	1.270404786	Face to Face	2	2	1	15		4	5	5	31-50%	3	4	Electronically	20	1	1	1	2	2
DEIDENTIFIED	DEIDENTIFIED	Exam-3	62	NA	NA	NA	Face to Face									NA
DEIDENTIFIED	DEIDENTIFIED	Exam-3	75	0.515315964	-3.235708591	1.413972028	Face to Face	2	2	2	16		8	5	6	71-100%	5	5	Electronically	20	1	1	1	2	2
DEIDENTIFIED	DEIDENTIFIED	Exam-3	78.5	-0.286763484	-0.530642242	-0.207468223	Face to Face	2	2	2	14		10	6	5	31-50%	3	2	Electronically	19	1	1	1	2	2
DEIDENTIFIED	DEIDENTIFIED	Exam-3	45	0.158608297	0.801309366	0.484766592	Face to Face	2	2	1	14	0	6	5	5	<10%	1	3	I did not ask questions at all	19	1	2	2	1	1
DEIDENTIFIED	DEIDENTIFIED	Exam-3	106	0.612332437	-1.594601509	1.461210272	Face to Face	1	1	1	14		2	2	4	71-100%	5	4	Electronically	20	1	2	2	1	1
DEIDENTIFIED	DEIDENTIFIED	Exam-3	76.5	NA	NA	NA	Face to Face									NA
DEIDENTIFIED	DEIDENTIFIED	Exam-3	74.5	0.134839027	-0.93429639	0.386877978	Face to Face	1	2	2	15	0	3	5	5	71-100%	5	5	Small Groups	20	1	1	1	2	2
DEIDENTIFIED	DEIDENTIFIED	Exam-3	83.5	0.015946594	-0.000615266	0.356876668	Face to Face	1	2	2	18		7	3	6	10-30%	2	2	I did not ask questions at all	20	1	1	1	2	2
DEIDENTIFIED	DEIDENTIFIED	Exam-3	81	-0.265618927	-1.76363059	0.176188871	Face to Face	2	2	1	14	5	5	6	4	31-50%	3	3	Electronically	19	1	1	1	2	2
DEIDENTIFIED	DEIDENTIFIED	Exam-3	90.5	NA	NA	NA	Face to Face									NA
DEIDENTIFIED	DEIDENTIFIED	Exam-3	89	0.338523135	-0.351487899	0.59849334	Face to Face	1	2	2	17		8	6	5	31-50%	3	2	Electronically	20	1	1	1	1	1
DEIDENTIFIED	DEIDENTIFIED	Exam-3	39	-0.387799001	1.253839714	-2.701584134	Face to Face	4	5	2	14		3	6	5	10-30%	2	1	I did not ask questions at all	19	1	1	1	1	1
DEIDENTIFIED	DEIDENTIFIED	Exam-3	61.5	0.237603855	0.28437912	0.011925812	Face to Face	3	2	1	18		3	4	6	NA		3	Electronically	20	1	1	1	2	2
DEIDENTIFIED	DEIDENTIFIED	Exam-3	34	-0.146678732	0.871652199	0.263959796	Face to Face	2	3	1	9	8		5	2	31-50%	3	3	Electronically	23	1	2	2	2	2
DEIDENTIFIED	DEIDENTIFIED	Exam-3	32	-0.313820397	0.112660832	-1.870340138	Face to Face	2	1	2	17		10	6	5	<10%	1	4	I did not ask questions at all	19	1	2	2	2	2
DEIDENTIFIED	DEIDENTIFIED	Exam-3	55	NA	NA	NA	Face to Face									NA
DEIDENTIFIED	DEIDENTIFIED	Exam-3	63.5	0.660764696	-0.477583714	0.873496808	Face to Face	2	1	1	11		5	1	5	31-50%	3	5	I did not ask questions at all	19	1	1	1	2	2
DEIDENTIFIED	DEIDENTIFIED	Exam-3	77	0.360045088	-3.48074118	0.216953337	Face to Face	1	2	1	15	40		7	7	10-30%	2	2	I did not ask questions at all	21	1	1	1	1	1
DEIDENTIFIED	DEIDENTIFIED	Exam-3	98	NA	NA	NA	Face to Face									NA
DEIDENTIFIED	DEIDENTIFIED	Exam-3	92.5	0.551357794	0.20000571	0.762976079	Face to Face	2	2	2	14		2	4	4	10-30%	2	5	Electronically	19	1	1	1	2	2
DEIDENTIFIED	DEIDENTIFIED	Exam-3	45.5	0.546110051	0.477846301	1.365807529	Face to Face	2	2	1	15		20	4	6	71-100%	5	3	Electronically	19	1	2	2	2	2
DEIDENTIFIED	DEIDENTIFIED	Exam-3	40	-0.800203199	0.913092344	1.114026409	Face to Face	2	4	2	18	0	7	6	2	31-50%	3	1	I did not ask questions at all	21	1	2	2	1	1
DEIDENTIFIED	DEIDENTIFIED	Exam-3	55.5	0.267283797	-0.547644287	0.777607559	Face to Face	2	2	2	14	15	28	5	7	71-100%	5	2	Electronically and Small Groups	19	1	1	1	1	1
DEIDENTIFIED	DEIDENTIFIED	Exam-3	85	0.655516954	-2.852027956	1.327760719	Face to Face	1	2	1	18	8		4	6	71-100%	5	3	I did not ask questions at all	20	1	1	1	2	2
DEIDENTIFIED	DEIDENTIFIED	Exam-3	89	0.551357794	-1.317977024	0.27979793	Face to Face	1	2	1	14		3	5	5	71-100%	5	5	I did not ask questions at all	20	1	1	1	2	2
DEIDENTIFIED	DEIDENTIFIED	Exam-3	62.3	-0.292559603	0.871652199	-0.580374267	Face to Face	3	4	2	16	9	9	6	4	51-70%	4	1	Electronically	20	1	1	1	2	2
DEIDENTIFIED	DEIDENTIFIED	Exam-3	106	0.836163194	0.586657812	1.461210272	Face to Face	1	2	1	14		5	5	7	51-70%	4	2	Electronically and In person	19	1	1	1	2	2
DEIDENTIFIED	DEIDENTIFIED	Exam-3	68	0.347673685	0.847214099	0.86686407	Face to Face	1	1	1	13	12	4	7	5	51-70%	4	3	Electronically and Small Groups	20	1	2	2	2	2
DEIDENTIFIED	DEIDENTIFIED	Exam-3	75.5	NA	NA	NA	Face to Face									NA
DEIDENTIFIED	DEIDENTIFIED	Exam-3	75.5	0.492891628	-0.126428822	-1.314228835	Face to Face	1	1	2	13			5	6	71-100%	5	1	Electronically and Small Groups	20	1	2	2	2	2
DEIDENTIFIED	DEIDENTIFIED	Exam-3	34	NA	NA	NA	Face to Face									NA
DEIDENTIFIED	DEIDENTIFIED	Exam-3	53.5	0.429909122	-1.100354003	1.365807529	Face to Face	2	2	2	18	10	15	6	5	10-30%	2	5	I did not ask questions at all	19	1	1	1	2	2
DEIDENTIFIED	DEIDENTIFIED	Exam-3	79.5	-0.650612204	0.277225325	0.358889995	Face to Face	4	4	2	17		10	7	2	10-30%	2	1	I did not ask questions at all	19	1	2	2	2	2
DEIDENTIFIED	DEIDENTIFIED	Exam-3	67.5	0.325749963	-0.375925999	0.309151917	Face to Face	2	4	4	10	18	5	5	6	71-100%	5	4	I did not ask questions at all	19	1	1	1	2	2
DEIDENTIFIED	DEIDENTIFIED	Exam-3	33.5	-0.720074469	1.717988444	-0.701660009	Face to Face	4	5	2	14		12	6	2	<10%	1	1	I did not ask questions at all	21	1	1	1	2	2
DEIDENTIFIED	DEIDENTIFIED	Exam-3	78	NA	NA	NA	Face to Face									NA
DEIDENTIFIED	DEIDENTIFIED	Exam-3	84	0.440173818	-0.474612247	0.398555283	Face to Face	1	2	1	12		4	3	5	51-70%	4	4	Electronically and Small Groups	19	1	1	1	1	1
DEIDENTIFIED	DEIDENTIFIED	Exam-3	98.5	0.551357794	1.057683325	0.539077323	Face to Face	1	2	2	14	16	7	4	4	71-100%	5	3	I did not ask questions at all	20	1	1	1	1	1
DEIDENTIFIED	DEIDENTIFIED	Exam-3	44.5	0.103082747	0.789690983	-1.355081109	Face to Face	5	5	1	13	0	0	7	7	<10%	1	2	I did not ask questions at all	20	1	1	1	2	2
DEIDENTIFIED	DEIDENTIFIED	Exam-3	86.5	NA	NA	NA	Face to Face									NA
DEIDENTIFIED	DEIDENTIFIED	Exam-3	52	-0.146726494	NA	0.194999383	Face to Face	5	5	3	14	15	5	5	5	10-30%	2	2	I did not ask questions at all	20	1	2	2	2	2
DEIDENTIFIED	DEIDENTIFIED	Exam-3	47	0.028719766	1.717988444	0.18630656	Face to Face	2	2	2	17	0	0	7	1	71-100%	5	2	I did not ask questions at all	10	1	1	1	2	2
DEIDENTIFIED	DEIDENTIFIED	Exam-3	73	-0.133174156	0.787278788	0.706059895	Face to Face	2	2	3	14	25	5	7	5	51-70%	4	4	Electronicallyear) arJmall Grounl	24	1	1	1	2	2
DEIDENTIFIED	DEIDENTIFIED	Exam-3	16	-0.716786827	0.825747466	-0.408877905	Face to Face	2	3	2	14		25	4	5	10-30%	2	4	I did not ask questions at all	19	1	1	1	2	2
DEIDENTIFIED	DEIDENTIFIED	Exam-3	35	NA	NA	NA	Face to Face									NA
DEIDENTIFIED	DEIDENTIFIED	Exam-3	53	NA	NA	NA	Face to Face									NA
DEIDENTIFIED	DEIDENTIFIED	Exam-3	87.5	NA	NA	NA	Face to Face									NA
DEIDENTIFIED	DEIDENTIFIED	Exam-3	51	0.071904283	-2.476717224	-0.382009788	Face to Face	2	1	2	12		6	3	5	71-100%	5	4	I did not ask questions at all	19	1	1	1	2	2
DEIDENTIFIED	DEIDENTIFIED	Exam-3	64	0.235095378	-3.37192967	1.280522475	Face to Face	1	1	1	15	20	10	5	7	71-100%	5	5	Electronically	20	1	2	2	2	2
DEIDENTIFIED	DEIDENTIFIED	Exam-3	55	-0.485430639	-3.417834402	-1.263918117	Face to Face	2	4	1	15	20	16	7	7	31-50%	3	5	I did not ask questions at all	21	1	1	1	1	1
DEIDENTIFIED	DEIDENTIFIED	Exam-3	95	0.441950892	-2.076968391	1.461210272	Face to Face	1	1	1	14	0		1	1	51-70%	4	2	Electronically	20	1	2	2	2	2
DEIDENTIFIED	DEIDENTIFIED	Exam-3	67.5	NA	NA	NA	Face to Face									NA
DEIDENTIFIED	DEIDENTIFIED	Exam-3	77.5	0.120671523	0.913092344	1.318569285	Face to Face	2	2	1	14		1	2	5	71-100%	5	5	Electronicaffy	19	1	1	1	2	2
DEIDENTIFIED	DEIDENTIFIED	Exam-3	60	NA	NA	NA	Face to Face									NA
DEIDENTIFIED	DEIDENTIFIED	Exam-3	66.5	0.721739339	-0.470424672	-0.213834524	Face to Face	2	4	2	15	20	5	7	6	31-50%	3	3	Small Groups	19	1	1	1	2	2
DEIDENTIFIED	DEIDENTIFIED	Exam-3	111	-0.001508552	-1.497131368	-1.244020534	Face to Face	1	1	1	14		8	5	3	71-100%	5	5	Electronically	20	1	2	2	2	2
DEIDENTIFIED	DEIDENTIFIED	Exam-3	30	0.064148064	-0.330021266	1.461210272	Face to Face	2	3	2	14		20	5	5	31-50%	3	3	In person	19	1	1	1	2	2
DEIDENTIFIED	DEIDENTIFIED	Exam-3	68	NA	NA	NA	Face to Face									NA
DEIDENTIFIED	DEIDENTIFIED	Exam-3	45.5	0.548849317	1.717988444	0.865937815	Face to Face	2	4	3	15	0	1	6	4	51-70%	4	5	Electronically and Small Groups	19	1	1	1	2	2
DEIDENTIFIED	DEIDENTIFIED	Exam-3	35.1	0.153073337	0.791184103	NA	Face to Face	3	3	1	14	18		7	4	31-50%	3	3	I did not ask questions at all	20	1	2	2	2	2
DEIDENTIFIED	DEIDENTIFIED	Exam-3	69	NA	NA	NA	Face to Face									NA
DEIDENTIFIED	DEIDENTIFIED	Exam-3	33	-0.126197103	0.958997077	-1.740757053	Face to Face	2	2	1	9		5	2	4	71-100%	5	4	I did not ask questions at all	19	1	1	1	2	2
DEIDENTIFIED	DEIDENTIFIED	Exam-3	77	0.328471835	-0.392928044	1.461210272	Face to Face	2	2	2	14			1	1	NA		1	Electronically	20	1	1	1	2	2
DEIDENTIFIED	DEIDENTIFIED	Exam-3	107	NA	NA	NA	Face to Face									NA
DEIDENTIFIED	DEIDENTIFIED	Exam-3	65.5	-0.792494742	-0.042055412	-0.141480187	Face to Face	2	2	2	12		10	5	4	10-30%	2	4	I did not ask questions at all	20	1	1	1	2	2
DEIDENTIFIED	DEIDENTIFIED	Exam-3	66.5	0.660764696	1.717988444	0.934971053	Face to Face	2	5	1	14	40	15	7	4	51-70%	4	4	Electronically	20	1	1	1	2	2
DEIDENTIFIED	DEIDENTIFIED	Exam-3	34.5	-0.584342056	-0.087960145	-0.484971524	Face to Face	2	2	2	14	0	10	5	4	10-30%	2	1	Electronically		1	2	2	1	1
DEIDENTIFIED	DEIDENTIFIED	Exam-3	84.5	0.663273173	-0.327049798	1.220680671	Face to Face	1	2	2	16		15	5	5	51-70%	4	3	Electronically	19	1	1	1	2	2
DEIDENTIFIED	DEIDENTIFIED	Exam-3	84.5	NA	NA	NA	Face to Face									NA
DEIDENTIFIED	DEIDENTIFIED	Exam-3	43	0.203569888	1.717988444	1.080039048	Face to Face	2	2	2	14	0	10	6	5	51-70%	4	1	I did not ask questions at all	19	1	2	2	2	2
DEIDENTIFIED	DEIDENTIFIED	Exam-3	28.5	-0.138970275	0.231597605	-1.267843448	Face to Face	2	4	3	12	20	25	7	2	10-30%	2	4	Small Groups		1	1	1	1	1
DEIDENTIFIED	DEIDENTIFIED	Exam-3	81	0.063368899	-2.730119715	0.089551775	Face to Face	2	2	1	15	6	4	3	5	51-70%	4	4	I did not ask questions at all	20	1	2	2	2	2
DEIDENTIFIED	DEIDENTIFIED	Exam-3	29.5	NA	NA	NA	Face to Face									NA
DEIDENTIFIED	DEIDENTIFIED	Exam-3	105.5	-0.000729386	-0.980201122	-0.015589628	Face to Face	2	2	2	14	18	4	5	4	51-70%	4	1	Electronically and Small Groupr	19	1	1	1	2	2
DEIDENTIFIED	DEIDENTIFIED	Exam-3	88.5	0.304489168	-2.897932689	-0.82231663	Face to Face	1	4	1	14		20	4	6	51-70%	4	3	I did not ask questions at all	19	1	2	2	2	2
DEIDENTIFIED	DEIDENTIFIED	Exam-3	85	0.533336879	-3.238680059	1.318569285	Face to Face	1	1	1	12	0	0	2	6	71-100%	5	1	Electronically	19	1	2	2	2	2
DEIDENTIFIED	DEIDENTIFIED	Exam-3	70	NA	NA	NA	Face to Face									NA
DEIDENTIFIED	DEIDENTIFIED	Exam-3	41.5	0.777697028	0.958997077	1.269918279	Face to Face	1	2	2	16	15	10	6	7	71-100%	5	5	Electronically	19	1	2	2	2	2
DEIDENTIFIED	DEIDENTIFIED	Exam-3	81.5	NA	NA	NA	Face to Face									NA
DEIDENTIFIED	DEIDENTIFIED	Exam-3	77	0.384995294	-2.392343814	0.069695426	Face to Face	2	2	2	16	0	7	3	5	71-100%	5	3	I did not ask questions at all	20	1	2	2	2	2
DEIDENTIFIED	DEIDENTIFIED	Exam-3	37	-0.378484451	1.717988444	0.762976079	Face to Face	4	4	4	17	10	18	7	3	10-30%	2	5	I did not ask questions at all	19	1	1	1	2	2
DEIDENTIFIED	DEIDENTIFIED	Exam-3	66.5	0.203569888	-0.583423757	0.079813115	Face to Face	2	2	2	15		15	3	6	31-50%	3	3	Electronically	20	1	2	2	2	2
DEIDENTIFIED	DEIDENTIFIED	Exam-3	34.5	NA	NA	NA	Face to Face									NA
DEIDENTIFIED	DEIDENTIFIED	Exam-3	26	0.541093098	-0.980201122	0.080786128	Face to Face	2	3	2	13	15	5	5	4	51-70%	4	2	Electronically	19	1	1	1	2	2
DEIDENTIFIED	DEIDENTIFIED	Exam-3	43	0.330997705	-0.477583714	-1.306142101	Face to Face	2	2	2	13		8	7	7	51-70%	4	3	I did not ask questions at all	19	1	1	1	2	2
DEIDENTIFIED	DEIDENTIFIED	Exam-3	96.5	NA	NA	NA	Face to Face									NA
DEIDENTIFIED	DEIDENTIFIED	Exam-3	40	-0.341326842	-0.186646393	0.091431557	Face to Face	2	4	4	15	0	30	6	5	31-50%	3	3	I did not ask questions at all	19	1	1	1	2	2
DEIDENTIFIED	DEIDENTIFIED	Exam-3	56	-0.539475991	1.408555957	1.31949554	Face to Face	4	5	3	16	25	10	7	3	51-70%	4	2	I did not ask questions at all	21	1	1	1	2	2
DEIDENTIFIED	DEIDENTIFIED	Exam-3	62.5	-0.480182897	-0.020588779	-0.015589628	Face to Face	4	4	1	15		15	5	5	31-50%	3	5	Electronically	19	1	1	1	1	1
DEIDENTIFIED	DEIDENTIFIED	Exam-3	50	-0.292559603	0.692497855	-0.166862717	Face to Face	2	3	3	12	15	40	5	5	51-70%	4	4	Small Groups	19	1	1	1	2	2
DEIDENTIFIED	DEIDENTIFIED	Exam-3	72.5	-0.716007661	-0.95873449	-0.994519178	Face to Face	3	4	2	16	9	2	5	4	31-50%	3	5	I did not ask questions at all	22	1	2	2	1	1
DEIDENTIFIED	DEIDENTIFIED	Exam-3	39.5	0.653008477	-1.0431079	-1.725140455	Face to Face	1	2	1	17		0	5	6	31-50%	3	2	I did not ask questions at all	19	1	1	1	2	2
DEIDENTIFIED	DEIDENTIFIED	Exam-3	36	-0.294806921	-0.2382118	0.636599013	Face to Face	3	4	1	15	12		3	6	31-50%	3	3	Electronically	20	1	2	2	2	2
DEIDENTIFIED	DEIDENTIFIED	Exam-3	42.5	-1.156008482	1.253839714	0.232559686	Face to Face	4	5	4	12	0	3	7	1	<10%	1	5	I did not ask questions at all	20	1	2	2	2	2
DEIDENTIFIED	DEIDENTIFIED	Exam-3	32.5	NA	NA	NA	Face to Face									NA
DEIDENTIFIED	DEIDENTIFIED	Exam-3	80	-0.036205447	-1.913882246	0.85426051	Face to Face	1	2	2	13	30	0	7	7	51-70%	4	3	I did not ask questions at all	19	1	2	2	2	2
DEIDENTIFIED	DEIDENTIFIED	Exam-3	46.5	-1.325610862	-1.974099816	-2.167240554	Face to Face	3	4	1	16	10	5	7	4	<10%	1	3	I did not ask questions at all	21	1	1	1	1	1
DEIDENTIFIED	DEIDENTIFIED	Exam-3	86	NA	NA	NA	NA									NA
DEIDENTIFIED	DEIDENTIFIED	Exam-3		NA	NA	NA	NA									NA
DEIDENTIFIED	DEIDENTIFIED	Exam-3	16	NA	NA	NA	NA									NA
DEIDENTIFIED	DEIDENTIFIED	Exam-3	70.5	NA	NA	NA	NA									NA
DEIDENTIFIED	DEIDENTIFIED	Exam-3		NA	NA	NA	NA									NA
DEIDENTIFIED	DEIDENTIFIED	Exam-3	18.5	NA	NA	NA	NA									NA
DEIDENTIFIED	DEIDENTIFIED	Exam-3	81.5	NA	NA	NA	NA									NA
DEIDENTIFIED	DEIDENTIFIED	Exam-3	16.5	NA	NA	NA	NA									NA
DEIDENTIFIED	DEIDENTIFIED	Exam-3	54	NA	NA	NA	NA									NA
DEIDENTIFIED	DEIDENTIFIED	Exam-3	60.5	-0.829652351	-1.693287757	-0.436220422	NA	1	1	3	14		10	3	5	10-30%	2	2	I did not ask questions at all	19	1	1	1	2	2
DEIDENTIFIED	DEIDENTIFIED	Exam-3	26.5	NA	NA	NA	NA									NA
DEIDENTIFIED	DEIDENTIFIED	Exam-3	43.6	NA	NA	NA	NA									NA
DEIDENTIFIED	DEIDENTIFIED	Exam-3	8.5	NA	NA	NA	NA									NA
DEIDENTIFIED	DEIDENTIFIED	Exam-3	0	NA	NA	NA	NA									NA
DEIDENTIFIED	DEIDENTIFIED	Exam-3	71.5	NA	NA	NA	NA									NA
DEIDENTIFIED	DEIDENTIFIED	Exam-3	0	NA	NA	NA	NA									NA
DEIDENTIFIED	DEIDENTIFIED	Exam-3	27.5	NA	NA	NA	NA									NA
DEIDENTIFIED	DEIDENTIFIED	Exam-3	50	NA	NA	NA	NA									NA
DEIDENTIFIED	DEIDENTIFIED	Exam-3	43.5	NA	NA	NA	NA									NA
DEIDENTIFIED	DEIDENTIFIED	Exam-3	55.5	NA	NA	NA	NA									NA
DEIDENTIFIED	DEIDENTIFIED	Exam-3	54	NA	NA	NA	NA									NA
DEIDENTIFIED	DEIDENTIFIED	Exam-3	51	NA	NA	NA	NA									NA
DEIDENTIFIED	DEIDENTIFIED	Exam-3	59.5	NA	NA	NA	NA									NA
DEIDENTIFIED	DEIDENTIFIED	Exam-3	8	NA	NA	NA	NA									NA
DEIDENTIFIED	DEIDENTIFIED	Exam-3	50	NA	NA	NA	NA									NA
DEIDENTIFIED	DEIDENTIFIED	Exam-3	65	NA	NA	NA	NA									NA
DEIDENTIFIED	DEIDENTIFIED	Exam-3	84	NA	NA	NA	NA									NA
DEIDENTIFIED	DEIDENTIFIED	Exam-3	83	NA	NA	NA	NA									NA
DEIDENTIFIED	DEIDENTIFIED	Exam-3		NA	NA	NA	NA									NA
DEIDENTIFIED	DEIDENTIFIED	Exam-3	47	NA	NA	NA	NA									NA
DEIDENTIFIED	DEIDENTIFIED	Exam-3	49	NA	NA	NA	NA									NA
DEIDENTIFIED	DEIDENTIFIED	Exam-3	24	NA	NA	NA	NA									NA
DEIDENTIFIED	DEIDENTIFIED	Exam-3	63.5	NA	NA	NA	NA									NA
DEIDENTIFIED	DEIDENTIFIED	Exam-3	0	NA	NA	NA	NA									NA
DEIDENTIFIED	DEIDENTIFIED	Exam-3	0	NA	NA	NA	NA									NA
DEIDENTIFIED	DEIDENTIFIED	Exam-3	33	NA	NA	NA	NA									NA
DEIDENTIFIED	DEIDENTIFIED	Exam-3	48.5	NA	NA	NA	NA									NA
DEIDENTIFIED	DEIDENTIFIED	Exam-3	45.5	NA	NA	NA	NA									NA
DEIDENTIFIED	DEIDENTIFIED	Exam-3	72.5	NA	NA	NA	Online									NA
DEIDENTIFIED	DEIDENTIFIED	Exam-3	57	NA	NA	NA	Online									NA
DEIDENTIFIED	DEIDENTIFIED	Exam-3	53	NA	NA	NA	Online									NA
DEIDENTIFIED	DEIDENTIFIED	Exam-3	50	0.161116774	-2.852027956	1.222680035	Online	2	4	1	16		15	3	7	31-50%	3	3	Electronically	20	1	1	1	2	2
DEIDENTIFIED	DEIDENTIFIED	Exam-3	70	0.607315483	-1.805070735	0.715737835	Online	2	4	1	16		8	5	6	51-70%	4	5	Electronically	19	1	2	2	2	2
DEIDENTIFIED	DEIDENTIFIED	Exam-3	70	0.197372	0.154100977	1.461210272	Online	2	2	2	15		5	6	5	71-100%	5	2	I did not ask questions at all	19	1	2	2	2	2
DEIDENTIFIED	DEIDENTIFIED	Exam-3	51	0.668290126	-2.907780939	0.011325246	Online	1	1	1	15		4	1	6	51-70%	4	2	I did not ask questions at all	19	1	1	1	2	2
DEIDENTIFIED	DEIDENTIFIED	Exam-3	65	NA	NA	NA	Online									NA
DEIDENTIFIED	DEIDENTIFIED	Exam-3	35	0.113578232	-0.779580146	-1.273109551	Online	2	2	1	3	40	10	2	7	31-50%	3	5	I did not ask questions at all	24	1	1	1	1	1
DEIDENTIFIED	DEIDENTIFIED	Exam-3	43	-0.250106488	1.609176933	-0.410877269	Online	4	4	2	17		3	2	4	51-70%	4	1	Electronically	20	1	1	1	1	1
DEIDENTIFIED	DEIDENTIFIED	Exam-3	92.5	-0.009264771	-1.717725857	-0.110992371	Online	2	2	1	14		15	3	6	51-70%	4	3	I did not ask questions at all	19	1	1	1	2	2
DEIDENTIFIED	DEIDENTIFIED	Exam-3	19	-1.463474355	1.5632722	0.770535072	Online	3	4	2	14	20		7	2	71-100%	5	5	I did not ask questions at all	21	1	1	1	2	2
DEIDENTIFIED	DEIDENTIFIED	Exam-3	71.75	NA	NA	NA	Online									NA
DEIDENTIFIED	DEIDENTIFIED	Exam-3	74	0.543601575	-2.114503222	1.030314933	Online	2	3	2	15		5	2	5	71-100%	5	2	I did not ask questions at all	19	1	2	2	2	2
DEIDENTIFIED	DEIDENTIFIED	Exam-3	38.5	0.342425943	1.717988444	-1.803792771	Online	2	3	1	12			7	3	51-70%	4	1		20	1	1	1	2	2
DEIDENTIFIED	DEIDENTIFIED	Exam-3	57	0.656296119	0.608124445	-0.678309639	Online	1	3	4	17		24	6	4	<10%	1	3	I did not ask questions at all	20	1	1	1	2	2
DEIDENTIFIED	DEIDENTIFIED	Exam-3	47.9	0.668290126	-3.635457424	-0.042338161	Online	5	5	1	17	36	10	7	5	51-70%	4	2	I did not ask questions at all	21	1	1	1	1	1
DEIDENTIFIED	DEIDENTIFIED	Exam-3	92.5	NA	NA	NA	Online									NA
DEIDENTIFIED	DEIDENTIFIED	Exam-3	32	0.836163194	-3.635457424	1.461210272	Online	1	1	1	15	20	15	7	7	10-30%	2	5	I did not ask questions at all	19	1	2	2	2	2
DEIDENTIFIED	DEIDENTIFIED	Exam-3	28	0.003173422	0.671031223	-0.170347668	Online	2	2	1	11			1	4	31-50%	3	3	I did not ask questions at all	21	1	2	2	2	2
DEIDENTIFIED	DEIDENTIFIED	Exam-3	61	NA	NA	NA	Online									NA
DEIDENTIFIED	DEIDENTIFIED	Exam-3	32	NA	NA	NA	Online									NA
DEIDENTIFIED	DEIDENTIFIED	Exam-3	38.5	0.506396203	1.45446069	1.461210272	Online	2	3	2	13	0	7	3	6	<10%	1	2	I did not ask questions at all	19	1	1	1	2	2
DEIDENTIFIED	DEIDENTIFIED	Exam-3	92.75	NA	NA	NA	Online									NA
DEIDENTIFIED	DEIDENTIFIED	Exam-3	36.5	NA	NA	NA	Online									NA
DEIDENTIFIED	DEIDENTIFIED	Exam-3	25	NA	NA	NA	Online									NA
DEIDENTIFIED	DEIDENTIFIED	Exam-3	40.5	-0.438508948	-0.392928044	-0.562110982	Online	4	4	4	15	0	2	1	1	31-50%	3	5	I did not ask questions at all	19	1	1	1	2	2
DEIDENTIFIED	DEIDENTIFIED	Exam-3	82.5	-0.909919022	1.5632722	0.346831804	Online	1	4	1	15		10	5	5	71-100%	5	5	I did not ask questions at all	19	1	2	2	1	1
DEIDENTIFIED	DEIDENTIFIED	Exam-3	22.9	-0.025277822	0.431941569	-1.292932452	Online	2	4	1	15	20	5	6	4	51-70%	4	5	I did not ask questions at all		1	1	1	1	1
DEIDENTIFIED	DEIDENTIFIED	Exam-3	29.5	0.039599628	-1.192163469	1.032361056	Online	1	1	1	15			1	1	<10%	1	1	Small Groups	20	1	1	1	1	1
DEIDENTIFIED	DEIDENTIFIED	Exam-3	53.5	-0.199396542	0.417628731	-0.477412531	Online	4	5	1	15	0	10	5	6	71-100%	5	4	I did not ask questions at all	20	1	2	2	2	2
DEIDENTIFIED	DEIDENTIFIED	Exam-3	32	-0.404474981	-1.296510392	-0.954353421	Online	2	2	2	14		20	4	5	10-30%	2	3	I did not ask questions at all	19	1	1	1	2	2
DEIDENTIFIED	DEIDENTIFIED	Exam-3	38.5	-0.883149327	1.717988444	-0.617008316	Online	4	3	4	17		5	7	3	10-30%	2	2	I did not ask questions at all	19	1	2	2	2	2
DEIDENTIFIED	DEIDENTIFIED	Exam-3	55.5	NA	NA	NA	Online									NA
DEIDENTIFIED	DEIDENTIFIED	Exam-3	40.5	-0.005361963	1.717988444	0.243750485	Online	4	4	2	18	15	23	5	5	31-50%	3	4	I did not ask questions at all	19	1	2	2	1	1
DEIDENTIFIED	DEIDENTIFIED	Exam-3	29	0.660764696	1.609176933	0.991828375	Online	1	1	2	3	0	6	5	4	71-100%	5	4	I did not ask questions at all	19	1	1	1	2	2
DEIDENTIFIED	DEIDENTIFIED	Exam-3	45.5	0.40245044	1.717988444	1.125277928	Online	2	4	1	15	0	8	5	4	71-100%	5	2	Electronically and Small Groups	20	1	1	1	1	1
DEIDENTIFIED	DEIDENTIFIED	Exam-3	23.5	-0.217417456	1.717988444	1.365807529	Online	2	4	2	14	20	25	7	3	71-100%	5	2	Small Groups	20	1	1	1	2	2
DEIDENTIFIED	DEIDENTIFIED	Exam-3	58.5	0.769940809	1.717988444	1.04155249	Online	2	2	1	17		9	5	5	31-50%	3	3	I did not ask questions at all	19	1	2	2	2	2
DEIDENTIFIED	DEIDENTIFIED	Exam-3	58	0.145882888	-0.196771655	0.244236991	Online	2	2	1	16		5	5	5	51-70%	4	3	Small Groups	19	1	1	1	1	1
DEIDENTIFIED	DEIDENTIFIED	Exam-3	72	NA	NA	NA	Online									NA
DEIDENTIFIED	DEIDENTIFIED	Exam-3	46.5	-0.735021138	-1.538571513	-2.694025141	Online	2	3	2	14		10	4	4	<10%	1	4	I did not ask questions at all	20	1	2	2	2	2
DEIDENTIFIED	DEIDENTIFIED	Exam-3	38	NA	NA	NA	Online									NA
DEIDENTIFIED	DEIDENTIFIED	Exam-3	25	-1.698118184	1.717988444	-2.549971393	Online	4	4	2	15		0	1	1	10-30%	2	5	I did not ask questions at all	20	1	1	1	1	1
DEIDENTIFIED	DEIDENTIFIED	Exam-3	62.5	0.440173818	0.608124445	0.349317675	Online	2	2	2	14	0		7	5	51-70%	4	4	Small Groups	19	1	2	2	2	2
DEIDENTIFIED	DEIDENTIFIED	Exam-3	68	-0.087481163	-1.451226635	0.677571443	Online	2	2	1	18	12	6	5	5	51-70%	4	1	I did not ask questions at all	20	1	2	2	2	2
DEIDENTIFIED	DEIDENTIFIED	Exam-3	39	0.653008477	1.408555957	1.029875185	Online	2	2	1	18		7	2	5	51-70%	4	4	I did not ask questions at all	19	1	1	1	2	2
DEIDENTIFIED	DEIDENTIFIED	Exam-3	61	NA	NA	NA	Online									NA
DEIDENTIFIED	DEIDENTIFIED	Exam-3	67.5	0.148391364	1.45446069	-1.610601511	Online	2	2	2	13		0	4	6	51-70%	4	5	Electronically	20	1	2	2	2	2
DEIDENTIFIED	DEIDENTIFIED	Exam-3	51.5	0.836163194	1.717988444	1.461210272	Online	2	3	1	14	15	15	7	5	10-30%	2	4	Electronically		1	1	1	2	2
DEIDENTIFIED	DEIDENTIFIED	Exam-3	78	NA	NA	NA	Online									NA
DEIDENTIFIED	DEIDENTIFIED	Exam-3	20	NA	NA	NA	Online									NA
DEIDENTIFIED	DEIDENTIFIED	Exam-3	63	NA	NA	NA	Online									NA
DEIDENTIFIED	DEIDENTIFIED	Exam-3	51.5	0.424160766	1.500365423	-0.17378835	Online	4	4	1	15		12	7	2	51-70%	4	2	I did not ask questions at all	19	1	1	1	1	1
DEIDENTIFIED	DEIDENTIFIED	Exam-3	77	-0.011773247	0.045289466	1.223166542	Online	2	4	2	16	0	3	7	5	51-70%	4	5	Electronically	20	1	1	1	2	2
DEIDENTIFIED	DEIDENTIFIED	Exam-3	61	0.836163194	0.695469323	1.461210272	Online	2	2	1	15		5	1	6	51-70%	4	2	I did not ask questions at all	20	1	1	1	2	2
DEIDENTIFIED	DEIDENTIFIED	Exam-3	34.5	NA	NA	NA	Online									NA
DEIDENTIFIED	DEIDENTIFIED	Exam-3	56	0.586786092	1.717988444	0.411187399	Online	2	3	1	15	12	0	5	4	<10%	1	5	I did not ask questions at all	19	1	2	2	2	2
DEIDENTIFIED	DEIDENTIFIED	Exam-3	85	0.370711554	-1.739192489	0.166510931	Online	2	2	1	14		3	5	5	51-70%	4	5	Electronically	19	1	1	1	2	2
DEIDENTIFIED	DEIDENTIFIED	Exam-3	31.48	-1.032270077	-0.112398245	-2.827474694	Online	1	1	1	13		10	5	2	31-50%	3	5	Electronically	19	1	1	1	1	1
DEIDENTIFIED	DEIDENTIFIED	Exam-3	53	NA	NA	NA	Online									NA
DEIDENTIFIED	DEIDENTIFIED	Exam-3	28	-0.351543775	1.067808588	0.406174996	Online	2	3	1	12	0	0	3	4	31-50%	3	3	I did not ask questions at all	21	1	2	2	1	1
DEIDENTIFIED	DEIDENTIFIED	Exam-3	58	0.408648328	1.717988444	-2.397652466	Online	2	3	1	15		18	7	6	NA		4	I did not ask questions at all	19	1	2	2	2	2
DEIDENTIFIED	DEIDENTIFIED	Exam-3	57	-0.737316218	-0.443297364	0.111374042	Online	4	4	1	16	15	8	6	1	<10%	1	3	I did not ask questions at all	19	1	2	2	2	2
DEIDENTIFIED	DEIDENTIFIED	Exam-3	70.5	NA	NA	NA	Online									NA
DEIDENTIFIED	DEIDENTIFIED	Exam-3	44	-1.507986413	-2.124351472	-2.134900227	Online	2	2	2	14	10		2	2	10-30%	2	2	I did not ask questions at all	20	2	1	1	1	1
DEIDENTIFIED	DEIDENTIFIED	Exam-3	58	NA	NA	NA	Online									NA
DEIDENTIFIED	DEIDENTIFIED	Exam-3	41	0.325749963	1.5632722	-0.265310663	Online	2	2	2	15	20	0	5	4	51-70%	4	2	I did not ask questions at all	20	1	2	2	2	2
DEIDENTIFIED	DEIDENTIFIED	Exam-3	30.5	NA	NA	1.461210272	Online	2	2	2	14	0	12	4	4	51-70%	4	5	Electronically	19	1	1	1	2	2
DEIDENTIFIED	DEIDENTIFIED	Exam-3	43	-0.27063588	1.717988444	-0.415290963	Online	2	2	1	16	20	2	7	4	51-70%	4	5	Electronically and Small Groups	22	1	1	1	1	1
DEIDENTIFIED	DEIDENTIFIED	Exam-3	71	-0.077216467	0.716935955	-0.227691496	Online	2	2	2	17		5	6	3	31-50%	3	3	Electronically and Small Groups	19	1	1	1	2	2
DEIDENTIFIED	DEIDENTIFIED	Exam-3	76	0.130370449	0.460561996	0.435042477	Online	4	4	1	12	0	4	6	6	51-70%	4	4	I did not ask questions at all	20	1	1	1	2	2
DEIDENTIFIED	DEIDENTIFIED	Exam-3	53	NA	NA	NA	Online									NA
DEIDENTIFIED	DEIDENTIFIED	Exam-3	55.5	0.721739339	0.045289466	1.128690054	Online	1	2	1	17		11	4	5	31-50%	3	2	Electronically	18	1	1	1	1	1
DEIDENTIFIED	DEIDENTIFIED	Exam-3	62	0.551357794	-0.61798712	1.222680035	Online	1	2	2	14		10	5	4	31-50%	3	1	I did not ask questions at all		1	1	1	1	1
DEIDENTIFIED	DEIDENTIFIED	Exam-3	40	-0.183884103	0.439095364	-2.09506016	Online	2	2	1	14		0	2	5	31-50%	3	2	I did not ask questions at all	19	1	1	1	2	2
DEIDENTIFIED	DEIDENTIFIED	Exam-3	64	0.120671523	0.499312934	0.770535072	Online	2	2	1	16		5	3	5	71-100%	5	3	I did not ask questions at all	20	1	2	2	2	2
DEIDENTIFIED	DEIDENTIFIED	Exam-3	36.5	NA	NA	NA	Online									NA
DEIDENTIFIED	DEIDENTIFIED	Exam-3	51	-0.452013523	0.042317999	-2.299377442	Online	5	5	2	15	0	10	1	6	51-70%	4	3	I did not ask questions at all	20	1	2	2	2	2
DEIDENTIFIED	DEIDENTIFIED	Exam-3	41.5	0.332940413	-0.196771655	0.790271839	Online	2	2	1	14	0	10	3	5	51-70%	4	4	I did not ask questions at all	20	1	1	1	2	2
DEIDENTIFIED	DEIDENTIFIED	Exam-3	74.5	0.836163194	-0.087960145	0.711619523	Online	4	4	3	18			4	5	31-50%	3	4	Electronically	22	1	1	1	2	2
DEIDENTIFIED	DEIDENTIFIED	Exam-3	12	-2.268178517	-3.635457424	-2.969189426	Online	1	1	1	7	17	31	1	1	NA		3	I did not ask questions at all	23	2	1	2	2	2
DEIDENTIFIED	DEIDENTIFIED	Exam-3	87.5	NA	NA	NA	Online									NA
DEIDENTIFIED	DEIDENTIFIED	Exam-3	76.5	0.213834584	-0.874361079	0.127537866	Online	4	4	4	14	6		7	6	51-70%	4	1	I did not ask questions at all	19	1	1	1	1	1
DEIDENTIFIED	DEIDENTIFIED	Exam-3	81	0.562353892	1.408555957	1.461210272	Online	1	2	4	17	0	2	3	6	51-70%	4	5	I did not ask questions at all	19	1	1	1	2	2
DEIDENTIFIED	DEIDENTIFIED	Exam-3	65.5	NA	NA	NA	Online									NA
DEIDENTIFIED	DEIDENTIFIED	Exam-3	67	NA	NA	NA	Online									NA
DEIDENTIFIED	DEIDENTIFIED	Exam-3	32.5	-0.025064426	0.221472342	-0.194644983	Online	2	4	1	12	15	5	7	5	31-50%	3	4	I did not ask questions at all	20	1	1	1	1	1
DEIDENTIFIED	DEIDENTIFIED	Exam-3	52.5	-0.257862707	-0.066493512	-0.477412531	Online	2	2	1	17	0	0	2	4	31-50%	3	5	Electronically	19	1	1	1	2	2
DEIDENTIFIED	DEIDENTIFIED	Exam-3	32.5	-0.348517292	1.717988444	-1.592878071	Online	4	3	2	18	1	10	7	3	10-30%	2	3	Small Groups	21	1	2	2	2	2
DEIDENTIFIED	DEIDENTIFIED	Exam-3	48.5	-0.374795039	-0.087960145	-1.042683677	Online	1	2	2	16		10	5	4	31-50%	3	3	Electronically	24	1	1	1	1	1
DEIDENTIFIED	DEIDENTIFIED	Exam-3	80.5	NA	NA	NA	Online									NA
DEIDENTIFIED	DEIDENTIFIED	Exam-3	52.75	NA	NA	NA	Online									NA
DEIDENTIFIED	DEIDENTIFIED	Exam-3	44	-0.954602061	-0.087960145	-2.336676832	Online	4	2	1	14	15	3	4	5	<10%	1	3	I did not ask questions at all	20	1	1	1	2	2
DEIDENTIFIED	DEIDENTIFIED	Exam-3	67	0.597050788	1.04068128	-0.677336626	Online	3	5	2	15		3	2	4	10-30%	2	3	I did not ask questions at all	18	1	1	1	1	1
DEIDENTIFIED	DEIDENTIFIED	Exam-3	99.75	NA	NA	NA	Online									NA
DEIDENTIFIED	DEIDENTIFIED	Exam-3	41.5	0.145882888	1.500365423	0.024089623	Online	2	3	1	15		3	3	5	31-50%	3	2	I did not ask questions at all	19	1	2	2	2	2
DEIDENTIFIED	DEIDENTIFIED	Exam-3	53.25	NA	NA	NA	Online									NA
DEIDENTIFIED	DEIDENTIFIED	Exam-3	43.5	-0.077995632	0.695469323	0.887234198	Online	2	2	4	13	10	5	7	4	31-50%	3	1	Electronically	18	1	2	2	1	1
DEIDENTIFIED	DEIDENTIFIED	Exam-3	49.5	-0.915838359	-1.968156881	-0.713337314	Online	4	2	1	16		5	6	4	31-50%	3	2	Electronically	19	1	2	2	2	2
DEIDENTIFIED	DEIDENTIFIED	Exam-3	46	-0.989816963	0.130878984	-1.1507507	Online	3	3	5	14		11	7	3	<10%	1	3	I did not ask questions at all	19	1	2	2	2	2
DEIDENTIFIED	DEIDENTIFIED	Exam-3	25.5	0.526359825	0.245910443	1.049551232	Online	2	3	4	14	34	27	5	3	10-30%	2	5	I did not ask questions at all	21	1	1	1	2	2
DEIDENTIFIED	DEIDENTIFIED	Exam-3	77	-0.034763353	0.671031223	0.263473289	Online	2	2	2	14			1	3	51-70%	4	3	I did not ask questions at all	19	1	1	1	2	2
DEIDENTIFIED	DEIDENTIFIED	Exam-3	54.5	0.099410729	-1.166232248	-0.948913375	Online	3	3	3	14		10	3	3	31-50%	3	3	Electronically	20	1	1	1	1	1
DEIDENTIFIED	DEIDENTIFIED	Exam-3	48	-0.208882072	-0.066493512	-0.275355527	Online	1	2	1	14	10	4	4	4	51-70%	4	4	I did not ask questions at all	19	1	2	2	1	1
DEIDENTIFIED	DEIDENTIFIED	Exam-3	71.5	0.836163194	-0.51902386	1.461210272	Online	4	4	1	15		32	7	4	<10%	1	2	I did not ask questions at all	19	1	1	1	2	2
DEIDENTIFIED	DEIDENTIFIED	Exam-3	22	-1.319035578	1.717988444	-0.11206548	Online	5	3	4	17	20	3	5	4	<10%	1	1	Electronically	19	1	1	1	2	2
DEIDENTIFIED	DEIDENTIFIED	Exam-3	67	NA	NA	NA	Online									NA
DEIDENTIFIED	DEIDENTIFIED	Exam-3	71	-0.324085093	1.717988444	-1.398352788	Online	1	4	4	16	10	20	4	3	<10%	1	3	I did not ask questions at all	19	1	1	1	2	2
DEIDENTIFIED	DEIDENTIFIED	Exam-3	26	-0.574904289	1.717988444	1.175928298	Online	2	4	3	13			7	2	10-30%	2	2	Small Groups	20	1	1	1	2	2
DEIDENTIFIED	DEIDENTIFIED	Exam-3	63	0.665781649	1.717988444	0.463530929	Online	1	2	1	13		2	7	6	10-30%	2	3	I did not ask questions at all	20	1	1	1	2	2
DEIDENTIFIED	DEIDENTIFIED	Exam-3	30	-0.942346895	1.717988444	-1.004636867	Online	2	5	3	12	18	15	5	3	<10%	1	3	I did not ask questions at all	20	1	2	2	2	2
DEIDENTIFIED	DEIDENTIFIED	Exam-3	51	0.370711554	-1.666160449	-2.376356083	Online	2	4	1	14	40	10	7	5	31-50%	3	2	I did not ask questions at all	19	1	1	1	2	2
DEIDENTIFIED	DEIDENTIFIED	Exam-3	45.5	-0.321576616	-0.846951512	-0.026841146	Online	1	2	3	14	5	14	5	6	51-70%	4	3	Electronically	19	1	1	1	2	2
DEIDENTIFIED	DEIDENTIFIED	Exam-3	60	0.186328139	-1.826537368	0.580169335	Online	1	1	1	14	0	14	2	7	71-100%	5	2	Electronically	20	1	2	2	2	2
DEIDENTIFIED	DEIDENTIFIED	Exam-3	65	NA	NA	NA	Online									NA
DEIDENTIFIED	DEIDENTIFIED	Exam-3	35	NA	NA	NA	Online									NA
DEIDENTIFIED	DEIDENTIFIED	Exam-3	38.5	NA	NA	NA	Online									NA
DEIDENTIFIED	DEIDENTIFIED	Exam-3	102.5	0.780205505	-0.175305023	0.232559686	Online	2	2	2	14	12	1	6	6	31-50%	3	3	Electronically	20	1	1	1	2	2
DEIDENTIFIED	DEIDENTIFIED	Exam-3	41.5	-0.053186038	-2.852027956	0.780652761	Online	2	4	1	16		15	7	7	71-100%	5	2	I did not ask questions at all	19	1	2	2	2	2
DEIDENTIFIED	DEIDENTIFIED	Exam-3	32.5	-0.067068008	1.067808588	-2.214478798	Online	3	3	2	16	0	14	3	3	10-30%	2	4	In person	19	1	1	1	2	2
DEIDENTIFIED	DEIDENTIFIED	Exam-3	31	-0.527203432	-1.113450733	-0.752530058	Online	2	2	2	12	31	20	7	7	71-100%	5	3	I did not ask questions at all	21	1	2	2	1	1
DEIDENTIFIED	DEIDENTIFIED	Exam-3	65	NA	NA	NA	Online									NA
DEIDENTIFIED	DEIDENTIFIED	Exam-3	5.5	-0.497638042	1.5632722	0.237164504	Online	2	4	1	18	14	4	5	3	51-70%	4	4	Electronically	20	1	1	1	2	2
DEIDENTIFIED	DEIDENTIFIED	Exam-3	59	0.31297679	1.500365423	0.627407579	Online	2	4	5	13		15	5	2	<10%	1	2	Electronically and Small Groups	20	1	2	2	2	2
DEIDENTIFIED	DEIDENTIFIED	Exam-3	33	0.350182162	1.717988444	-0.420496347	Online	1	4	2	14	0	13	3	3	10-30%	2	2	I did not ask questions at all	21	1	1	1	1	1
DEIDENTIFIED	DEIDENTIFIED	Exam-3	68	0.237603855	0.431941569	-2.011935287	Online	2	2	1	16	0	20	7	4	31-50%	3	2	I did not ask questions at all	19	1	2	2	2	2
DEIDENTIFIED	DEIDENTIFIED	Exam-3	69	NA	NA	NA	Online									NA
DEIDENTIFIED	DEIDENTIFIED	Exam-3	69.5	0.283296848	-2.533963327	1.125277928	Online	2	3	1	15	10	10	6	7	NA		5	I did not ask questions at all	19	1	1	1	2	2
DEIDENTIFIED	DEIDENTIFIED	Exam-3	60.5	NA	NA	NA	Online									NA
DEIDENTIFIED	DEIDENTIFIED	Exam-3	43.5	-0.605650613	-1.742163957	-0.939235435	Online	4	4	2	12	10	3	5	4	31-50%	3	2	I did not ask questions at all	20	1	1	1	1	1
DEIDENTIFIED	DEIDENTIFIED	Exam-3	84	-0.165478812	-2.259094203	-0.141480187	Online	3	4	2	14					10-30%	2	5	Electronically	19	1	1	1	2	2
DEIDENTIFIED	DEIDENTIFIED	Exam-3	24.5	-0.180383065	1.717988444	-0.928484385	Online	2	4	2	13		6	7	2	<10%	1	3	I did not ask questions at all	19	1	1	1	1	1
DEIDENTIFIED	DEIDENTIFIED	Exam-3	35.5	0.127861973	1.717988444	0.674645823	Online	2	4	2	18		3	6	4	51-70%	4	4	I did not ask questions at all	19	1	1	1	2	2
DEIDENTIFIED	DEIDENTIFIED	Exam-3	15	NA	NA	NA	Online									NA
DEIDENTIFIED	DEIDENTIFIED	Exam-3	37.75	NA	NA	NA	Online									NA
DEIDENTIFIED	DEIDENTIFIED	Exam-3	59	-0.052218498	-1.067546	-0.053149931	Online	4	3	2	13	15	6	6	4	51-70%	4	3	I did not ask questions at all	19	1	2	2	2	2
DEIDENTIFIED	DEIDENTIFIED	Exam-3	49.5	-0.67104607	-1.584476246	-0.454970214	Online	4	4	3	12		7	5	3	51-70%	4	5	I did not ask questions at all	19	1	1	1	2	2
DEIDENTIFIED	DEIDENTIFIED	Exam-3	46.5	0.116818112	0.934558977	-0.207954729	Online	4	5	1	18		3	3	5	10-30%	2	4	I did not ask questions at all	19	1	1	1	2	2
DEIDENTIFIED	DEIDENTIFIED	Exam-3	49.5	-0.219360164	1.717988444	-0.170286949	Online	3	3	2	16		2	6	3	NA		3	I did not ask questions at all	19	1	1	1	1	1
DEIDENTIFIED	DEIDENTIFIED	Exam-3	50.5	0.168872993	0.428970101	-1.962697679	Online	2	4	4	17	0	8	5	6	NA		2	I did not ask questions at all	19	1	1	1	1	1
DEIDENTIFIED	DEIDENTIFIED	Exam-3	58	-0.167871052	1.5632722	0.647144346	Online	2	4	1	18	10	2	7	2	51-70%	4	2	I did not ask questions at all		1	1	1	2	2
DEIDENTIFIED	DEIDENTIFIED	Exam-3	58.5	-0.077995632	1.717988444	-0.072459054	Online	4	5	2	16		5	5	3	10-30%	2	1		20	1	1	1	2	2
DEIDENTIFIED	DEIDENTIFIED	Exam-3	40.5	-0.080504109	1.717988444	-1.388335195	Online	2	2	1	14		4	5	4	51-70%	4	2	Electronically and In person		1	2	2	1	1
DEIDENTIFIED	DEIDENTIFIED	Exam-3	79	-0.144218017	1.500365423	1.175928298	Online	2	2	1	12		10	3	4	51-70%	4	1	Electronically	19	1	1	1	2	2
DEIDENTIFIED	DEIDENTIFIED	Exam-3	52.5	-0.10862572	-0.407240881	1.461210272	Online	4	4	1	18	10		7	5	10-30%	2	3	Electronically	19	2	1	1	2	2
DEIDENTIFIED	DEIDENTIFIED	Exam-3	18	-1.255321669	1.717988444	-0.606743772	Online	4	4	1	14	20	20	7	7	10-30%	2	5	I did not ask questions at all	19	1	2	2	2	2
DEIDENTIFIED	DEIDENTIFIED	Exam-3	24	-0.142659687	1.717988444	-0.188231925	Online	2	3	3	15		2	7	3	51-70%	4	5	I did not ask questions at all	20	1	2	2	2	2
DEIDENTIFIED	DEIDENTIFIED	Exam-3	83	0.176629212	-0.150866922	0.638011774	Online	3	2	2	14		5	3	4	51-70%	4	1	Electronically	20	1	1	1	2	2
DEIDENTIFIED	DEIDENTIFIED	Exam-3	45	0.186328139	1.321211079	-0.808180725	Online	3	2	1	14	8	3	5	3	31-50%	3	2	I did not ask questions at all		1	1	1	1	1
DEIDENTIFIED	DEIDENTIFIED	Exam-3	9.5	-0.322124992	1.222524831	-1.41411624	Online	2	3	2	12			4	5	<10%	1	1	I did not ask questions at all	22	1	1	1	1	1
DEIDENTIFIED	DEIDENTIFIED	Exam-3	29	NA	NA	NA	Online									NA
DEIDENTIFIED	DEIDENTIFIED	Exam-3	72	-0.387019836	-1.584476246	-1.09036167	Online	2	1	1	13	10		4	7	31-50%	3	2	I did not ask questions at all	19	1	2	2	2	2
DEIDENTIFIED	DEIDENTIFIED	Exam-3	33.5	0.014217283	1.717988444	0.655896031	Online	1	2	2	14	0	24	7	7	51-70%	4	4	Small Groups		1	2	2	1	1
DEIDENTIFIED	DEIDENTIFIED	Exam-3	80.5	0.307729048	-3.635457424	-0.195630101	Online	1	2	2	14	15	0	7	6	51-70%	4	2	Small Groups	19	1	1	1	1	1
DEIDENTIFIED	DEIDENTIFIED	Exam-3	44.5	-0.404474981	1.212399568	-0.351035465	Online	2	2	2	16	12	20	6	4	51-70%	4	2		20	1	1	2	2	2
DEIDENTIFIED	DEIDENTIFIED	Exam-3	43	NA	NA	NA	Online									NA
DEIDENTIFIED	DEIDENTIFIED	Exam-3	50	0.213834584	0.741374056	-0.368612051	Online	5	5	5	14		30	5	5	<10%	1	2	I did not ask questions at all	20	1	1	1	2	2
DEIDENTIFIED	DEIDENTIFIED	Exam-3	24.5	0.307729048	1.717988444	0.981663928	Online	3	4	3	16			7	5	51-70%	4	2	Small Groups	22	2	2	2	2	2
DEIDENTIFIED	DEIDENTIFIED	Exam-3	50.5	NA	NA	NA	Online									NA
